# Supplementary material for: Hemodynamic and metabolomic responses to infusion of GLP-1 agonist exenatide in pulmonary arterial hypertension
Source: JCI journal article supplement (doi:10.1172/jci.insight.202660), 2026-05-22
Supplement: sd1 [file 1]

## **LIST OF SUPPLEMENTARY MATERIALS**

Figure S1: Change in blood glucose level with administration of GLP-1 agonist exenatide

Figure S2. Change in metabolites with GLP-1 agonist Exenatide infusion across the heart and lungs.

Figure S3. Representative images illustrating the septal shift at end-systole (dotted lines) for all scanned MCT rats (R1-6).

Table S1: Changes in haemodynamics pre and post GLP-1 infusion.

Table S2. Individual patients' haemodynamic measurements pre and post infusion of GLP-1 agonist Exenatide.

Table S3: Changes in right ventricular performance pre and post GLP-1 infusion

## **COMPETING INTERESTS**

None of the authors have any conflicts of interest relevant to this study.

## Supplementary Material

### Figure S1

Change in blood glucose level with administration of GLP-1 agonist exenatide. Changes in plasma glucose pre and post exenatide infusion in the included clinical study patients.

### Figure S2

Change in metabolites with GLP-1 agonist Exenatide infusion across the heart and lungs. Shown are the mean change in metabolite levels at radial arterial site following exenatide infusion compared to baseline. Red dots are metabolites with significant change with false discovery rate ( $FDRq < 0.05$ ), blue dots are metabolites with a significant change ( $p < 0.05$ ), and black dots are metabolites with no significant difference. Negative values represent a reduction in the metabolite level following exenatide infusion. Selected metabolites with known prognostic significance in idiopathic PAH are named. Detailed values for mean change in metabolite level are provided in Table S4.

### Figure S3

Representative images illustrating the septal shift at end-systole (dotted lines) for all scanned MCT rats (R1-6). Dotted lines outline the septal shift pre and post infusion of exenatide.

## Supplementary Material

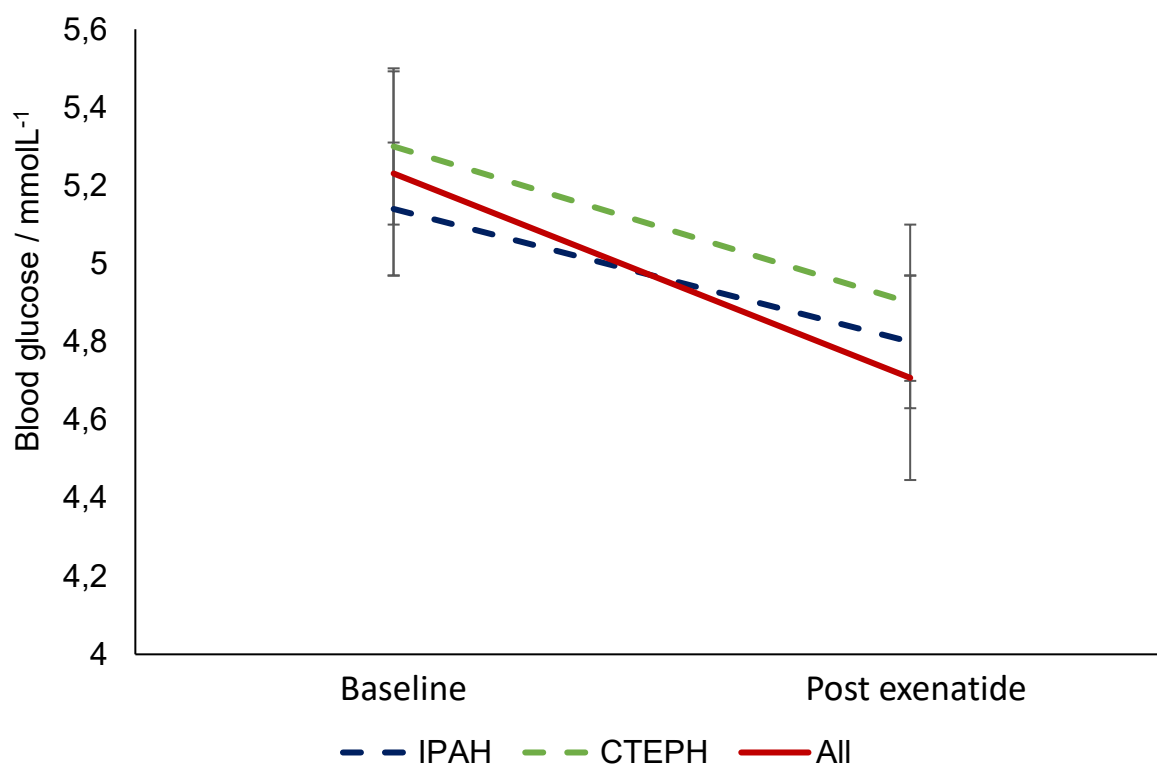

Figure S1

Changes in plasma glucose pre and post exenatide infusion in the included clinical study patients.

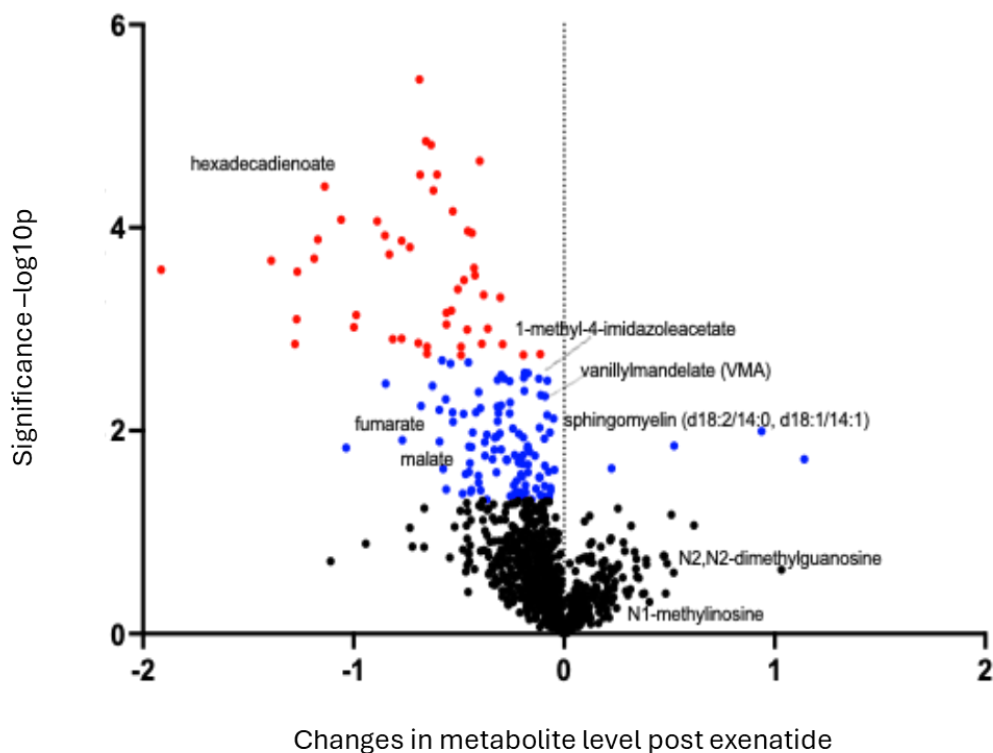

Figure S2

Change in metabolites following exenatide infusion across the heart and lungs. Shown are the mean change in metabolite levels at radial arterial site following exenatide infusion compared to baseline. Red dots are metabolites with significant change with false discovery rate (FDRq < 0.05), blue dots are metabolites with a significant change ( $p < 0.05$ ), and black dots are metabolites with no significant difference. Negative values represent a reduction in the metabolite level following exenatide infusion. Selected metabolites with known prognostic significance in idiopathic PAH are named. Detailed values for mean change in metabolite level are provided in Table S4.

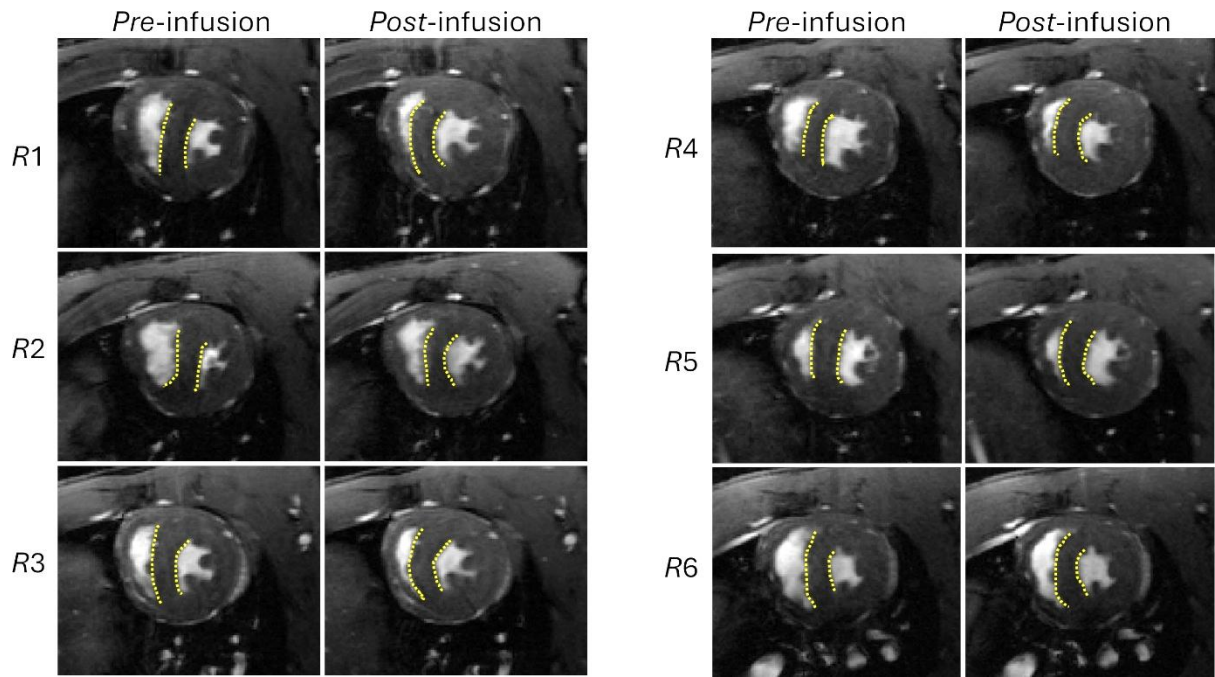

Figure S3

Representative images illustrating the septal shift at end-systole (dotted lines) for all scanned MCT rats (R1-6). Dotted lines outline the septal shift pre and post infusion of exenatide.

| Haemodynamics                          | IPAH group<br>N = 9 |                |              | CTEPH group<br>N = 8 |                |              | Total cohort<br>N = 17 |                |                  |
|----------------------------------------|---------------------|----------------|--------------|----------------------|----------------|--------------|------------------------|----------------|------------------|
|                                        | Baseline            | Post exenatide | P            | Baseline             | Post exenatide | P            | Baseline               | Post exenatide | P                |
| HR (bpm)                               | 73 (21)             | 79 (9)         | <b>0.005</b> | 78 (18)              | 88 (8)         | <b>0.005</b> | 75 (16)                | 84 (14)        | <b>&lt;0.001</b> |
| SBP (mmHg)                             | 109 (12)            | 112 (24)       | 0.95         | 130 (14)             | 132 (18)       | 0.19         | 126 (24)               | 126 (18)       | 0.61             |
| DBP (mmHg)                             | 65 (5)              | 71 (10)        | 0.85         | 84 (7)               | 82 (12)        | 0.25         | 75 (21)                | 75 (17)        | 0.58             |
| sMAP (mmHg)                            | 78 (7)              | 89 (10)        | 0.82         | 95 (4)               | 96 (10)        | 0.34         | 86 (18)                | 88 (16)        | 0.55             |
| Arterial O <sub>2</sub> saturation (%) | 95 (5)              | 96 (7)         | 0.88         | 95 (2)               | 94 (3)         | 0.53         | 95 (4)                 | 95 (4)         | 0.66             |
| mRAP (mmHg)                            | 5 (7)               | 5 (4)          | 0.56         | 6 (5)                | 7 (5)          | 0.611        | 5 (6)                  | 6 (5)          | 0.41             |
| mPAP (mmHg)                            | 45 (11)             | 40 (11)        | <b>0.043</b> | 46 (18)              | 41 (19)        | <b>0.008</b> | 45 (15)                | 40 (18)        | <b>0.001</b>     |
| PCWP (mmHg)                            | 6 (4)               | 7 (4)          | 0.59         | 10 (5)               | 11 (5)         | 0.127        | 8 (7)                  | 9 (4)          | 0.17             |
| PA O <sub>2</sub> saturation (%)       | 71 (5)              | 76 (5)         | <b>0.005</b> | 66 (12)              | 69 (12)        | <b>0.039</b> | 68 (10)                | 72 (13)        | <b>0.012</b>     |
| SV (ml)                                | 68 (20)             | 70 (19)        | 0.13         | 45 (16)              | 45 (13)        | 0.74         | 55 (29)                | 58 (26)        | 0.17             |
| CO (L/min)                             | 4.4 (1.8)           | 5.7 (1.5)      | <b>0.004</b> | 3.5 (0.8)            | 4.3 (0.9)      | <b>0.004</b> | 3.9 (1.5)              | 4.8 (2.1)      | <b>&lt;0.001</b> |
| CI (L/min/m <sup>2</sup> )             | 2.2 (0.1)           | 2.7 (0.5)      | <b>0.005</b> | 1.8 (0.5)            | 1.9 (0.5)      | <b>0.005</b> | 2.1 (0.6)              | 2.4 (0.9)      | <b>0.004</b>     |
| PVR (Woods units)                      | 6.8 (7.8)           | 4.9 (4.5)      | <b>0.018</b> | 9.4 (8.4)            | 7.0 (7.4)      | <b>0.001</b> | 7.8 (8.0)              | 5.9 (5.0)      | <b>&lt;0.001</b> |
| PVC (ml/mmHg)                          | 1.3 (1.0)           | 1.6 (0.9)      | <b>0.043</b> | 0.9 (0.8)            | 1.1 (1.0)      | 0.058        | 1.1 (1.0)              | 1.3 (1.1)      | <b>0.006</b>     |

Table S1

Changes in haemodynamics pre and post exenatide infusion. Numbers are median (interquartile range) unless otherwise stated. IPAH: idiopathic pulmonary arterial hypertension; CTEPH: chronic thromboembolic pulmonary arterial hypertension; HR: heart rate; bpm: beats per minute; SBP: systolic blood pressure; DBP: diastolic blood pressure, sMAP: systemic mean arterial pressure; O<sub>2</sub>: oxygen; mRAP: mean right atrial pressure; mPAP: mean pulmonary artery pressure; PCWP: mean pulmonary capillary wedge pressure; PA: pulmonary artery; SV: stroke volume; CO: cardiac output; CI: cardiac index; PVR: pulmonary vascular resistance; PVC: pulmonary vascular compliance.

| Patient No | Diagnosis | Disease specifics          | CTEPH distribution | mPAP-pre (mmHg) | mPAP-post (mmHg) | PCWP-pre (mmHg) | PCWP-post (mmHg) | PASat-pre (mmHg) | PASat-post (mmHg) | SV-pre (ml) | SV-post (ml) | CO-pre (L/ min) | CO-post (L/ min) | PVR-pre (WU) | PVR-post (WU) |
|------------|-----------|----------------------------|--------------------|-----------------|------------------|-----------------|------------------|------------------|-------------------|-------------|--------------|-----------------|------------------|--------------|---------------|
| 1          | IPAH      | BMPR2                      | -                  | 47              | 48               | 8               | 9                | 74.8             | 76.1              | 73          | 71           | 6.39            | 6.63             | 6.1          | 5.9           |
| 2          | IPAH      | -                          | -                  | 45              | 41               | 3               | 3                | 71.2             | 76.5              | 55          | 63           | 3.03            | 4.52             | 13.9         | 8.4           |
| 3          | IPAH      | -                          | -                  | 26              | 24               | 8               | 7                | 70.2             | 72.0              | 77          | 81           | 4.54            | 5.70             | 4.0          | 3.0           |
| 4          | IPAH      | -                          | -                  | 43              | 40               | 4               | 7                | 71.3             | 72.6              | 82          | 83           | 6.19            | 6.78             | 6.3          | 4.9           |
| 5          | IPAH      | -                          | -                  | 33              | 25               | 9               | 11               | 58.8             | 61.9              | 68          | 69           | 4.99            | 5.36             | 4.8          | 2.6           |
| 6          | IPAH      | Positive NO vasoreactivity | -                  | 45              | 30               | 3               | 1                | 76.6             | 80.9              | 53          | 48           | 2.69            | 3.38             | 15.6         | 8.9           |
| 7          | IPAH      | BMPR2                      | -                  | 54              | 50               | 8               | 9                | 61.1             | 62.5              | 39          | 44           | 3.23            | 3.87             | 14.2         | 10.6          |
| 8          | IPAH      | -                          | -                  | 36              | 32               | 6               | 8                | 69.7             | 76.4              | 75          | 86           | 4.52            | 6.02             | 6.6          | 3.9           |
| 9          | IPAH      | -                          | -                  | 50              | 41               | 13              | 12               | 95.0             | 96.0              | 59          | 66           | 4.73            | 5.92             | 7.8          | 4.9           |
| 10         | CTEPH     | -                          | Operable           | 45              | 40               | 13              | 13               | 65.7             | 67.9              | 45          | 48           | 3.39            | 4.06             | 9.4          | 6.7           |
| 11         | CTEPH     | -                          | Non-operable       | 47              | 43               | 11              | 11               | 71.0             | 73.1              | 57          | 58           | 3.86            | 4.41             | 9.3          | 7.3           |
| 12         | CTEPH     | -                          | Non-operable       | 30              | 28               | 8               | 9                | 68.8             | 71.6              | 44          | 46           | 3.69            | 4.22             | 6.0          | 4.5           |
| 13         | CTEPH     | -                          | Non-operable       | 55              | 49               | 12              | 13               | 54.0             | 55.0              | 33          | 34           | 2.90            | 3.13             | 14.8         | 11.5          |
| 14         | CTEPH     | -                          | Non-operable       | 48              | 46               | 3               | 5                | 57.9             | 60.1              | 39          | 40           | 3.23            | 3.49             | 13.9         | 11.7          |
| 15         | CTEPH     | -                          | Operable           | 33              | 24               | 3               | 4                | 70.0             | 70.8              | 75          | 77           | 6.02            | 6.23             | 5.0          | 3.2           |
| 16         | CTEPH     | -                          | Non-operable       | 25              | 23               | 12              | 13               | 68.8             | 69.6              | 53          | 44           | 4.06            | 3.88             | 3.2          | 2.6           |
| 17         | CTEPH     | -                          | Non-operable       | 69              | 64               | 11              | 11               | 42.3             | 44.5              | 37          | 34           | 2.80            | 3.10             | 20.7         | 17.1          |

Table S2

Individual patients' haemodynamic measurements pre and post exenatide. IPAH: idiopathic pulmonary arterial hypertension; CTEPH: chronic thromboembolic pulmonary hypertension; mPAP: mean pulmonary artery pressure; PCWP: pulmonary capillary wedge pressure; PASat: pulmonary artery oxygen saturation; CO: cardiac output; PVR: pulmonary vascular resistance in Wood Units; NO: nitric oxide.

|                                                              | Baseline        | Post exenatide   |
|--------------------------------------------------------------|-----------------|------------------|
| <b>RV volumes</b>                                            |                 |                  |
| Stroke volume index (ml beat <sup>-1</sup> m <sup>-2</sup> ) | 33.5 (4.2)      | 37.1 (5.0) *     |
| End-diastolic volume index (ml m <sup>-2</sup> )             | 73.5 (7.6)      | 75.5 (7.1) *     |
| End-systolic volume index (ml m <sup>-2</sup> )              | 40.8 (7.1)      | 38.1 (7.1) *     |
| <b>RV systolic function</b>                                  |                 |                  |
| dP/dt max (mmHg s <sup>-1</sup> )                            | 480.0 (124.3)   | 555.0 (191.5)    |
| E <sub>ES</sub> (mmHg ml <sup>-1</sup> )                     | 0.51 (0.09)     | 0.65 (0.11) *    |
| RV ejection fraction (%)                                     | 42.6 (4.1)      | 46.1 (3.8) *     |
| Stroke Work (mmHg ml)                                        | 3305.5 (431.0)  | 3705.5 (274.0) * |
| <b>RV afterload</b>                                          |                 |                  |
| E <sub>A</sub> (mmHg ml <sup>-1</sup> )                      | 0.95 (0.63)     | 0.83 (0.56) *    |
| <b>RV pulmonary arterial coupling</b>                        |                 |                  |
| E <sub>es</sub> /E <sub>a</sub>                              | 0.65 (0.21)     | 0.97 (0.46) *    |
| <b>RV diastolic function</b>                                 |                 |                  |
| Tau (ms)                                                     | 40.0 (1.5)      | 41.0 (3.0)       |
| dP/dt min (mmHg s <sup>-1</sup> )                            | - 521.5 (143.5) | - 550.0 (167.5)  |
| End-diastolic pressure (mmHg)                                | 8.5 (4.3)       | 8.0 (4.8)        |

Table S3

Changes in right ventricular performance pre and post exenatide infusion in a subset of PAH patients (n=4). Numbers are median (interquartile range) unless otherwise stated. ml: millilitres; l: litres; RV: right ventricle; E<sub>ES</sub>: Ventricular end-systolic elastance; E<sub>A</sub>: pulmonary arterial elastance. \* denotes statistically significant difference (p <0.05) on a pair-wise comparison between pre and post measurements.

| Pathway    | Metabolite name             | Mean difference | 95% CI |       | P    | FDR (Q) |
|------------|-----------------------------|-----------------|--------|-------|------|---------|
|            |                             |                 | LL     | UL    |      |         |
| Amino Acid | xanthurenate                | -0.36           | -0.55  | -0.17 | 0.00 | 0.03    |
| Amino Acid | kynurenate                  | -0.39           | -0.60  | -0.18 | 0.00 | 0.04    |
| Amino Acid | vanillylmandelate (VMA)     | -0.32           | -0.53  | -0.11 | 0.01 | 0.10    |
| Amino Acid | dopamine 3-O-sulfate        | -0.08           | -0.14  | -0.03 | 0.01 | 0.11    |
| Amino Acid | 1-methyl-4-imidazoleacetate | -0.30           | -0.53  | -0.07 | 0.02 | 0.18    |
| Amino Acid | gentisate                   | -0.20           | -0.36  | -0.03 | 0.02 | 0.22    |
| Amino Acid | N-acetylkynurenine (2)      | 0.22            | 0.03   | 0.41  | 0.02 | 0.23    |
| Amino Acid | methylsuccinate             | -0.32           | -0.60  | -0.04 | 0.03 | 0.24    |
| Amino Acid | 8-methoxykynurenate         | -0.17           | -0.32  | -0.02 | 0.03 | 0.24    |
| Amino Acid | 3-methylhistidine           | -0.09           | -0.18  | -0.01 | 0.03 | 0.30    |
| Amino Acid | N-lactoyl phenylalanine     | -0.21           | -0.41  | -0.01 | 0.04 | 0.32    |
| Amino Acid | leucine                     | -0.37           | -0.73  | 0.00  | 0.05 | 0.34    |
| Amino Acid | thyroxine                   | -0.22           | -0.44  | 0.00  | 0.05 | 0.35    |
| Amino Acid | alanine                     | -0.34           | -0.68  | 0.01  | 0.05 | 0.35    |
| Amino Acid | N-formylphenylalanine       | -0.36           | -0.74  | 0.02  | 0.06 | 0.37    |
| Amino Acid | isovalerate (i5:0)          | -0.49           | -1.01  | 0.03  | 0.06 | 0.38    |
| Amino Acid | N-acetylphenylalanine       | -0.16           | -0.33  | 0.01  | 0.07 | 0.39    |
| Amino Acid | N-acetyltaurine             | -0.30           | -0.64  | 0.03  | 0.08 | 0.40    |
| Amino Acid | taurine                     | -0.25           | -0.53  | 0.04  | 0.09 | 0.43    |
| Amino Acid | N-acetylcitrulline          | -0.52           | -1.13  | 0.09  | 0.09 | 0.44    |
| Amino Acid | isovalerylglycine           | -0.38           | -0.83  | 0.08  | 0.10 | 0.46    |
| Amino Acid | N-lactoyl isoleucine        | -0.19           | -0.42  | 0.04  | 0.10 | 0.46    |
| Amino Acid | 4-hydroxyglutamate          | -0.17           | -0.38  | 0.04  | 0.10 | 0.47    |
| Amino Acid | N-formylanthranilic acid    | -0.20           | -0.45  | 0.05  | 0.10 | 0.47    |
| Amino Acid | ethylmalonate               | -0.11           | -0.26  | 0.03  | 0.11 | 0.48    |
| Amino Acid | cysteine                    | -0.46           | -1.05  | 0.13  | 0.12 | 0.49    |
| Amino Acid | tyrosine                    | -0.31           | -0.71  | 0.09  | 0.12 | 0.51    |

|            |                                |       |       |      |      |      |
|------------|--------------------------------|-------|-------|------|------|------|
| Amino Acid | isoleucine                     | -0.27 | -0.63 | 0.09 | 0.13 | 0.51 |
| Amino Acid | indolepropionate               | -0.06 | -0.14 | 0.02 | 0.13 | 0.51 |
| Amino Acid | S-methylmethionine             | -0.05 | -0.11 | 0.02 | 0.13 | 0.52 |
| Amino Acid | 2-oxoarginine*                 | -0.10 | -0.22 | 0.03 | 0.13 | 0.52 |
| Amino Acid | fructosyllysine                | -0.45 | -1.05 | 0.16 | 0.14 | 0.52 |
| Amino Acid | 6-bromotryptophan              | 0.17  | -0.06 | 0.41 | 0.14 | 0.52 |
| Amino Acid | gamma-carboxyglutamate         | -0.66 | -1.58 | 0.25 | 0.14 | 0.52 |
| Amino Acid | 6-oxopiperidine-2-carboxylate  | -0.25 | -0.59 | 0.10 | 0.14 | 0.53 |
| Amino Acid | N-lactoyl leucine              | -0.28 | -0.66 | 0.11 | 0.15 | 0.53 |
| Amino Acid | N-acetyl isoleucine            | -0.38 | -0.91 | 0.15 | 0.15 | 0.54 |
| Amino Acid | methionine sulfoxide           | -0.29 | -0.69 | 0.12 | 0.15 | 0.54 |
| Amino Acid | succinoyltaurine               | -0.15 | -0.36 | 0.06 | 0.15 | 0.54 |
| Amino Acid | N-acetyltyrosine               | -0.17 | -0.42 | 0.07 | 0.15 | 0.54 |
| Amino Acid | imidazole lactate              | -0.21 | -0.52 | 0.09 | 0.16 | 0.55 |
| Amino Acid | beta-hydroxyisovalerate        | 0.47  | -0.23 | 1.17 | 0.17 | 0.56 |
| Amino Acid | phenol sulfate                 | -0.03 | -0.06 | 0.01 | 0.17 | 0.56 |
| Amino Acid | N-acetylglutamine              | -0.14 | -0.34 | 0.07 | 0.17 | 0.56 |
| Amino Acid | N-acetylhistidine              | -0.12 | -0.30 | 0.06 | 0.18 | 0.56 |
| Amino Acid | 2-methylserine                 | -0.54 | -1.36 | 0.28 | 0.18 | 0.56 |
| Amino Acid | serine                         | -0.22 | -0.54 | 0.11 | 0.18 | 0.56 |
| Amino Acid | creatinine                     | -0.19 | -0.47 | 0.10 | 0.18 | 0.56 |
| Amino Acid | tryptophan betaine             | -0.06 | -0.16 | 0.03 | 0.18 | 0.56 |
| Amino Acid | aspartate                      | -0.17 | -0.43 | 0.09 | 0.18 | 0.56 |
| Amino Acid | 2,3-dihydroxy-2-methylbutyrate | 0.34  | -0.18 | 0.87 | 0.18 | 0.56 |
| Amino Acid | N6,N6-dimethyllysine           | -0.10 | -0.24 | 0.05 | 0.18 | 0.56 |
| Amino Acid | N-lactoyl valine               | -0.17 | -0.42 | 0.09 | 0.19 | 0.56 |
| Amino Acid | dimethylglycine                | -0.08 | -0.21 | 0.05 | 0.19 | 0.56 |
| Amino Acid | asparagine                     | -0.28 | -0.72 | 0.16 | 0.19 | 0.56 |
| Amino Acid | 3-methylglutaconate            | -0.23 | -0.58 | 0.13 | 0.19 | 0.56 |
| Amino Acid | N,N-dimethylalanine            | 0.19  | -0.11 | 0.49 | 0.19 | 0.56 |

|            |                             |       |       |      |      |      |
|------------|-----------------------------|-------|-------|------|------|------|
| Amino Acid | trans-urocanate             | -1.11 | -2.85 | 0.63 | 0.19 | 0.56 |
| Amino Acid | guanidinoacetate            | -0.18 | -0.46 | 0.10 | 0.20 | 0.56 |
| Amino Acid | threonine                   | -0.13 | -0.34 | 0.08 | 0.20 | 0.56 |
| Amino Acid | 4-methyl-2-oxopentanoate    | -0.17 | -0.43 | 0.10 | 0.20 | 0.56 |
| Amino Acid | isovalerylcarnitine (C5)    | -0.17 | -0.43 | 0.10 | 0.20 | 0.56 |
| Amino Acid | cystine                     | 0.13  | -0.08 | 0.35 | 0.20 | 0.57 |
| Amino Acid | N-acetyl-2-aminoadipate     | -0.28 | -0.72 | 0.16 | 0.20 | 0.57 |
| Amino Acid | 3-hydroxy-2-ethylpropionate | -0.22 | -0.57 | 0.14 | 0.22 | 0.59 |
| Amino Acid | tryptophan                  | 0.26  | -0.17 | 0.68 | 0.22 | 0.59 |
| Amino Acid | cysteine s-sulfate          | 0.22  | -0.15 | 0.58 | 0.22 | 0.60 |
| Amino Acid | N-acetylaspartate (NAA)     | -0.25 | -0.68 | 0.17 | 0.22 | 0.60 |
| Amino Acid | N-acetylserine              | -0.14 | -0.38 | 0.10 | 0.23 | 0.60 |
| Amino Acid | formiminoglutamate          | -0.07 | -0.18 | 0.05 | 0.23 | 0.60 |
| Amino Acid | hydantoin-5-propionate      | -0.06 | -0.16 | 0.04 | 0.23 | 0.60 |
| Amino Acid | N2-acetyl,N6-methyllysine   | 0.05  | -0.04 | 0.15 | 0.24 | 0.61 |
| Amino Acid | N-acetylthreonine           | -0.47 | -1.29 | 0.36 | 0.24 | 0.61 |
| Amino Acid | N-delta-acetylornithine     | -0.06 | -0.15 | 0.04 | 0.25 | 0.61 |
| Amino Acid | 3-amino-2-piperidone        | -0.10 | -0.28 | 0.08 | 0.25 | 0.61 |
| Amino Acid | histidine                   | -0.18 | -0.51 | 0.15 | 0.26 | 0.62 |
| Amino Acid | N6-acetyllysine             | -0.25 | -0.71 | 0.21 | 0.26 | 0.62 |
| Amino Acid | beta-citrylglutamate        | -0.36 | -1.01 | 0.30 | 0.26 | 0.62 |
| Amino Acid | phenylalanine               | -0.28 | -0.80 | 0.24 | 0.27 | 0.63 |
| Amino Acid | N-methylproline             | -0.04 | -0.11 | 0.03 | 0.27 | 0.63 |
| Amino Acid | arginine                    | -0.13 | -0.39 | 0.12 | 0.28 | 0.64 |
| Amino Acid | N-acetylcarnosine           | -0.16 | -0.46 | 0.14 | 0.28 | 0.64 |
| Amino Acid | alpha-hydroxyisovalerate    | -0.08 | -0.24 | 0.07 | 0.28 | 0.64 |
| Amino Acid | alpha-ketobutyrate          | 0.17  | -0.16 | 0.51 | 0.29 | 0.64 |
| Amino Acid | isobutyrylglycine           | 0.21  | -0.19 | 0.60 | 0.29 | 0.64 |
| Amino Acid | 1-ribosyl-imidazoleacetate* | -0.14 | -0.41 | 0.13 | 0.29 | 0.64 |
| Amino Acid | N-acetylarginine            | -0.10 | -0.28 | 0.09 | 0.29 | 0.64 |

|            |                                                  |       |       |      |      |      |
|------------|--------------------------------------------------|-------|-------|------|------|------|
| Amino Acid | ornithine                                        | -0.13 | -0.37 | 0.12 | 0.29 | 0.64 |
| Amino Acid | 4-guanidinobutanoate                             | -0.13 | -0.39 | 0.13 | 0.30 | 0.65 |
| Amino Acid | alpha-ketoglutaramate*                           | -0.13 | -0.40 | 0.14 | 0.31 | 0.65 |
| Amino Acid | m-tyramine sulfate                               | -0.27 | -0.81 | 0.28 | 0.31 | 0.66 |
| Amino Acid | oxindolylalanine                                 | -0.32 | -0.98 | 0.34 | 0.32 | 0.66 |
| Amino Acid | indoleacetate                                    | -0.07 | -0.22 | 0.08 | 0.32 | 0.67 |
| Amino Acid | hypotaurine                                      | -0.16 | -0.48 | 0.17 | 0.32 | 0.67 |
| Amino Acid | tiglylcarnitine (C5:1-DC)                        | -0.09 | -0.27 | 0.09 | 0.32 | 0.67 |
| Amino Acid | 1-methyl-5-imidazoleacetate                      | -0.06 | -0.17 | 0.06 | 0.33 | 0.67 |
| Amino Acid | S-methylcysteine sulfoxide                       | -0.04 | -0.12 | 0.04 | 0.33 | 0.67 |
| Amino Acid | methionine                                       | -0.24 | -0.76 | 0.27 | 0.33 | 0.67 |
| Amino Acid | N-lactoyl tyrosine                               | -0.07 | -0.21 | 0.08 | 0.33 | 0.67 |
| Amino Acid | vanillactate                                     | -0.06 | -0.21 | 0.08 | 0.34 | 0.68 |
| Amino Acid | 2-hydroxy-3-methylvalerate                       | -0.26 | -0.82 | 0.31 | 0.35 | 0.69 |
| Amino Acid | 1-methyl-5-imidazolelactate                      | -0.07 | -0.22 | 0.09 | 0.36 | 0.69 |
| Amino Acid | hydroxy-N6,N6,N6-trimethyllysine*                | 0.22  | -0.28 | 0.72 | 0.36 | 0.70 |
| Amino Acid | 2-aminobutyrate                                  | -0.09 | -0.32 | 0.13 | 0.39 | 0.70 |
| Amino Acid | 3-hydroxyisobutyrate                             | -0.14 | -0.47 | 0.19 | 0.39 | 0.70 |
| Amino Acid | cysteinylglycine disulfide*                      | -0.14 | -0.48 | 0.20 | 0.39 | 0.70 |
| Amino Acid | 2,3-dihydroxy-5-methylthio-4-pentenoate (DMTPA)* | -0.14 | -0.49 | 0.20 | 0.40 | 0.70 |
| Amino Acid | indolelactate                                    | -0.08 | -0.27 | 0.11 | 0.40 | 0.70 |
| Amino Acid | S-1-pyrroline-5-carboxylate                      | -0.24 | -0.84 | 0.36 | 0.40 | 0.71 |
| Amino Acid | 3-methoxytyramine sulfate                        | -0.09 | -0.32 | 0.14 | 0.41 | 0.71 |
| Amino Acid | N-succinyl-phenylalanine                         | 0.08  | -0.13 | 0.30 | 0.41 | 0.71 |
| Amino Acid | cys-gly, oxidized                                | -0.12 | -0.43 | 0.19 | 0.42 | 0.71 |
| Amino Acid | N-carbamoylvaline                                | 0.15  | -0.23 | 0.52 | 0.42 | 0.71 |
| Amino Acid | N-acetyl-3-methylhistidine*                      | -0.06 | -0.22 | 0.10 | 0.42 | 0.72 |
| Amino Acid | N-acetyl-isoputreanine                           | 0.13  | -0.20 | 0.46 | 0.42 | 0.72 |
| Amino Acid | proline                                          | -0.16 | -0.58 | 0.26 | 0.43 | 0.73 |
| Amino Acid | 3-methoxytyrosine                                | -0.06 | -0.22 | 0.10 | 0.43 | 0.73 |

|            |                                |       |       |      |      |      |
|------------|--------------------------------|-------|-------|------|------|------|
| Amino Acid | 4-methoxyphenol sulfate        | 0.07  | -0.12 | 0.26 | 0.44 | 0.73 |
| Amino Acid | 1-methylhistidine              | 0.11  | -0.19 | 0.42 | 0.45 | 0.73 |
| Amino Acid | cysteine-glutathione disulfide | -0.19 | -0.73 | 0.34 | 0.45 | 0.73 |
| Amino Acid | N-acetylglycine                | -0.14 | -0.53 | 0.25 | 0.45 | 0.73 |
| Amino Acid | citrulline                     | -0.15 | -0.56 | 0.26 | 0.46 | 0.73 |
| Amino Acid | lanthionine                    | 0.19  | -0.34 | 0.71 | 0.46 | 0.74 |
| Amino Acid | N6-methyllysine                | -0.03 | -0.10 | 0.05 | 0.46 | 0.74 |
| Amino Acid | 3-methyl-2-oxobutyrate         | -0.12 | -0.45 | 0.22 | 0.47 | 0.74 |
| Amino Acid | indoleacetylglutamine          | -0.05 | -0.20 | 0.10 | 0.48 | 0.75 |
| Amino Acid | 4-hydroxyphenylacetate         | -0.14 | -0.56 | 0.28 | 0.48 | 0.75 |
| Amino Acid | sarcosine                      | 0.40  | -0.80 | 1.61 | 0.49 | 0.75 |
| Amino Acid | argininate*                    | -0.05 | -0.22 | 0.11 | 0.50 | 0.76 |
| Amino Acid | 5-(galactosylhydroxy)-lysine   | -0.11 | -0.46 | 0.23 | 0.50 | 0.76 |
| Amino Acid | C-glycosyltryptophan           | -0.07 | -0.27 | 0.14 | 0.50 | 0.76 |
| Amino Acid | N2-acetyl,N6,N6-dimethyllysine | 0.03  | -0.06 | 0.12 | 0.52 | 0.77 |
| Amino Acid | serotonin                      | -0.10 | -0.44 | 0.24 | 0.53 | 0.78 |
| Amino Acid | p-cresol glucuronide*          | 0.03  | -0.07 | 0.13 | 0.54 | 0.78 |
| Amino Acid | N-acetylglutamate              | -0.09 | -0.40 | 0.22 | 0.55 | 0.79 |
| Amino Acid | tyramine O-sulfate             | 0.06  | -0.16 | 0.28 | 0.57 | 0.80 |
| Amino Acid | S-carboxyethylcysteine         | -0.11 | -0.53 | 0.30 | 0.58 | 0.81 |
| Amino Acid | lysine                         | -0.08 | -0.36 | 0.21 | 0.58 | 0.81 |
| Amino Acid | 5-oxoproline                   | 0.11  | -0.32 | 0.54 | 0.59 | 0.81 |
| Amino Acid | hydroxyasparagine**            | -0.08 | -0.41 | 0.24 | 0.59 | 0.81 |
| Amino Acid | 2-methylbutyrylcarnitine (C5)  | -0.09 | -0.43 | 0.26 | 0.59 | 0.81 |
| Amino Acid | glycine                        | -0.04 | -0.18 | 0.11 | 0.60 | 0.81 |
| Amino Acid | kynurenine                     | 0.06  | -0.18 | 0.30 | 0.61 | 0.82 |
| Amino Acid | 2-hydroxyphenylacetate         | -0.06 | -0.31 | 0.19 | 0.61 | 0.82 |
| Amino Acid | cysteinylglycine               | -0.07 | -0.36 | 0.22 | 0.62 | 0.82 |
| Amino Acid | N-formylmethionine             | -0.07 | -0.39 | 0.24 | 0.62 | 0.82 |
| Amino Acid | indolebutyrate                 | 0.05  | -0.15 | 0.24 | 0.63 | 0.83 |

|            |                                              |       |       |      |      |      |
|------------|----------------------------------------------|-------|-------|------|------|------|
| Amino Acid | isobutyrylcarnitine (C4)                     | -0.02 | -0.11 | 0.07 | 0.63 | 0.83 |
| Amino Acid | imidazole propionate                         | -0.05 | -0.25 | 0.16 | 0.63 | 0.83 |
| Amino Acid | S-methylcysteine                             | -0.03 | -0.14 | 0.09 | 0.64 | 0.83 |
| Amino Acid | beta-hydroxyisovaleroylcarnitine             | -0.05 | -0.26 | 0.16 | 0.64 | 0.83 |
| Amino Acid | S-adenosylhomocysteine (SAH)                 | 0.08  | -0.30 | 0.47 | 0.64 | 0.83 |
| Amino Acid | dimethylarginine (SDMA + ADMA)               | -0.08 | -0.45 | 0.29 | 0.65 | 0.84 |
| Amino Acid | 3-methyl-2-oxovalerate                       | -0.07 | -0.39 | 0.25 | 0.65 | 0.84 |
| Amino Acid | N-methyltaurine                              | -0.03 | -0.18 | 0.11 | 0.65 | 0.84 |
| Amino Acid | 5-hydroxyindole sulfate                      | 0.06  | -0.21 | 0.32 | 0.66 | 0.84 |
| Amino Acid | N-acetylmethionine                           | 0.04  | -0.17 | 0.26 | 0.67 | 0.85 |
| Amino Acid | dopamine 4-sulfate                           | -0.06 | -0.32 | 0.21 | 0.67 | 0.85 |
| Amino Acid | 2-hydroxybutyrate/2-hydroxyisobutyrate       | 0.03  | -0.10 | 0.16 | 0.67 | 0.85 |
| Amino Acid | indole-3-carboxylate                         | 0.06  | -0.21 | 0.32 | 0.67 | 0.85 |
| Amino Acid | phenylacetate                                | 0.03  | -0.11 | 0.17 | 0.68 | 0.86 |
| Amino Acid | 2-hydroxy-4-(methylthio)butanoic acid        | -0.02 | -0.15 | 0.10 | 0.68 | 0.86 |
| Amino Acid | 3-indoxyl sulfate                            | -0.03 | -0.17 | 0.12 | 0.69 | 0.86 |
| Amino Acid | valine                                       | 0.10  | -0.43 | 0.63 | 0.69 | 0.87 |
| Amino Acid | 3-methylglutarylcarnitine (2)                | 0.02  | -0.11 | 0.15 | 0.71 | 0.87 |
| Amino Acid | 4-hydroxyphenylpyruvate                      | -0.14 | -0.92 | 0.64 | 0.71 | 0.87 |
| Amino Acid | creatine                                     | -0.03 | -0.22 | 0.16 | 0.72 | 0.88 |
| Amino Acid | N-acetyl-1-methylhistidine*                  | -0.02 | -0.15 | 0.10 | 0.72 | 0.88 |
| Amino Acid | anthranilate                                 | 0.05  | -0.27 | 0.36 | 0.76 | 0.90 |
| Amino Acid | alpha-hydroxyisocaproate                     | 0.05  | -0.30 | 0.39 | 0.77 | 0.90 |
| Amino Acid | 5-hydroxylysine                              | 0.03  | -0.19 | 0.25 | 0.78 | 0.91 |
| Amino Acid | N,N,N-trimethyl-alanylproline betaine (TMAP) | -0.10 | -0.88 | 0.67 | 0.78 | 0.91 |
| Amino Acid | N-acetylleucine                              | -0.05 | -0.44 | 0.34 | 0.79 | 0.92 |
| Amino Acid | N-acetylglycine                              | 0.03  | -0.19 | 0.25 | 0.79 | 0.92 |
| Amino Acid | glutamate                                    | -0.03 | -0.29 | 0.23 | 0.80 | 0.92 |
| Amino Acid | N6,N6,N6-trimethyllysine                     | -0.02 | -0.23 | 0.18 | 0.80 | 0.92 |
| Amino Acid | methionine sulfone                           | -0.02 | -0.21 | 0.16 | 0.81 | 0.92 |

|            |                                    |       |       |      |      |      |
|------------|------------------------------------|-------|-------|------|------|------|
| Amino Acid | 2-ketocaprylate                    | 0.04  | -0.32 | 0.41 | 0.81 | 0.92 |
| Amino Acid | 4-hydroxyphenylacetoylcarnitine    | 0.01  | -0.08 | 0.10 | 0.81 | 0.92 |
| Amino Acid | cysteine sulfinic acid             | -0.04 | -0.44 | 0.36 | 0.82 | 0.92 |
| Amino Acid | N-acetylvaline                     | -0.03 | -0.30 | 0.25 | 0.83 | 0.93 |
| Amino Acid | 3-(4-hydroxyphenyl)lactate         | -0.02 | -0.18 | 0.15 | 0.84 | 0.93 |
| Amino Acid | glutarylcarnitine (C5-DC)          | 0.02  | -0.17 | 0.21 | 0.84 | 0.93 |
| Amino Acid | acisoga                            | -0.01 | -0.19 | 0.16 | 0.86 | 0.94 |
| Amino Acid | homocitrulline                     | -0.01 | -0.14 | 0.12 | 0.87 | 0.94 |
| Amino Acid | spermidine                         | -0.04 | -0.53 | 0.46 | 0.87 | 0.94 |
| Amino Acid | N-acetyl-aspartyl-glutamate (NAAG) | 0.04  | -0.51 | 0.59 | 0.88 | 0.95 |
| Amino Acid | pipecolate                         | 0.01  | -0.16 | 0.18 | 0.89 | 0.95 |
| Amino Acid | guanidinosuccinate                 | 0.02  | -0.24 | 0.27 | 0.89 | 0.95 |
| Amino Acid | 5-methylthioadenosine (MTA)        | -0.03 | -0.43 | 0.38 | 0.90 | 0.96 |
| Amino Acid | trans-4-hydroxyproline             | -0.01 | -0.15 | 0.13 | 0.90 | 0.96 |
| Amino Acid | picolinate                         | 0.02  | -0.33 | 0.37 | 0.90 | 0.96 |
| Amino Acid | homoarginine                       | 0.01  | -0.12 | 0.13 | 0.91 | 0.97 |
| Amino Acid | urea                               | -0.01 | -0.15 | 0.14 | 0.92 | 0.97 |
| Amino Acid | 7-hydroxyindole sulfate            | -0.01 | -0.22 | 0.20 | 0.92 | 0.97 |
| Amino Acid | 4-acetamidobutanoate               | -0.02 | -0.52 | 0.47 | 0.92 | 0.97 |
| Amino Acid | pro-hydroxy-pro                    | -0.02 | -0.46 | 0.42 | 0.92 | 0.97 |
| Amino Acid | 2-aminoadipate                     | 0.02  | -0.48 | 0.53 | 0.93 | 0.97 |
| Amino Acid | glutamine                          | 0.02  | -0.40 | 0.44 | 0.93 | 0.97 |
| Amino Acid | betaine                            | 0.00  | -0.12 | 0.11 | 0.94 | 0.97 |
| Amino Acid | N,N,N-trimethyl-5-aminovalerate    | 0.01  | -0.21 | 0.22 | 0.94 | 0.98 |
| Amino Acid | indolepropionylglycine             | 0.00  | -0.16 | 0.15 | 0.95 | 0.98 |
| Amino Acid | phenylpyruvate                     | -0.01 | -0.50 | 0.48 | 0.96 | 0.99 |
| Amino Acid | N-acetylputrescine                 | 0.01  | -0.33 | 0.34 | 0.97 | 0.99 |
| Amino Acid | cystathionine                      | -0.01 | -0.31 | 0.30 | 0.97 | 0.99 |
| Amino Acid | phenol glucuronide                 | 0.00  | -0.05 | 0.05 | 0.97 | 0.99 |
| Amino Acid | phenyllactate (PLA)                | 0.00  | -0.20 | 0.19 | 0.98 | 0.99 |

|                        |                                           |       |       |       |      |      |
|------------------------|-------------------------------------------|-------|-------|-------|------|------|
| Amino Acid             | N2,N5-diacetylornithine                   | 0.00  | -0.11 | 0.10  | 0.98 | 0.99 |
| Amino Acid             | N-acetylasparagine                        | 0.00  | -0.15 | 0.15  | 0.98 | 0.99 |
| Amino Acid             | N-methylhydroxyproline**                  | 0.00  | -0.39 | 0.39  | 0.99 | 1.00 |
| Amino Acid             | (N(1) + N(8))-acetylspermidine            | 0.00  | -0.23 | 0.24  | 1.00 | 1.00 |
| Carbohydrate           | glucose                                   | -1.28 | -1.98 | -0.58 | 0.00 | 0.04 |
| Carbohydrate           | lyxonate                                  | -0.48 | -0.80 | -0.15 | 0.01 | 0.11 |
| Carbohydrate           | maltotriose                               | -0.47 | -0.87 | -0.06 | 0.03 | 0.25 |
| Carbohydrate           | xylose                                    | -0.46 | -0.93 | 0.00  | 0.05 | 0.35 |
| Carbohydrate           | glycerate                                 | -0.19 | -0.38 | 0.00  | 0.05 | 0.36 |
| Carbohydrate           | mannitol/sorbitol                         | 0.12  | -0.01 | 0.25  | 0.07 | 0.39 |
| Carbohydrate           | N-acetylneuraminate                       | -0.16 | -0.35 | 0.02  | 0.08 | 0.40 |
| Carbohydrate           | glucuronate                               | -0.23 | -0.57 | 0.10  | 0.15 | 0.54 |
| Carbohydrate           | erythronate*                              | -0.23 | -0.65 | 0.19  | 0.26 | 0.63 |
| Carbohydrate           | lactate                                   | -0.28 | -0.82 | 0.27  | 0.30 | 0.65 |
| Carbohydrate           | ribitol                                   | -0.27 | -0.82 | 0.28  | 0.31 | 0.65 |
| Carbohydrate           | maltose                                   | -0.18 | -0.60 | 0.23  | 0.37 | 0.70 |
| Carbohydrate           | galactonate                               | -0.29 | -0.98 | 0.39  | 0.37 | 0.70 |
| Carbohydrate           | arabonate/xylonate                        | -0.08 | -0.26 | 0.11  | 0.39 | 0.70 |
| Carbohydrate           | ribonate                                  | -0.20 | -0.72 | 0.32  | 0.42 | 0.71 |
| Carbohydrate           | N-acetylglucosamine/N-acetylgalactosamine | -0.17 | -0.63 | 0.28  | 0.42 | 0.72 |
| Carbohydrate           | arabitol/xylitol                          | -0.13 | -0.47 | 0.22  | 0.44 | 0.73 |
| Carbohydrate           | 1,5-anhydroglucitol (1,5-AG)              | -0.07 | -0.30 | 0.15  | 0.49 | 0.75 |
| Carbohydrate           | pyruvate                                  | -0.27 | -1.12 | 0.59  | 0.52 | 0.77 |
| Carbohydrate           | fructose                                  | 0.19  | -0.80 | 1.18  | 0.69 | 0.87 |
| Carbohydrate           | sucrose                                   | 0.03  | -0.19 | 0.26  | 0.75 | 0.89 |
| Carbohydrate           | 3-phosphoglycerate                        | 0.08  | -0.58 | 0.74  | 0.80 | 0.92 |
| Carbohydrate           | mannose                                   | -0.04 | -0.36 | 0.28  | 0.81 | 0.92 |
| Carbohydrate           | N-acetylglucosaminylasparagine            | -0.02 | -0.40 | 0.36  | 0.90 | 0.96 |
| Cofactors and Vitamins | gamma-CEHC                                | -0.12 | -0.22 | -0.01 | 0.03 | 0.26 |

|                        |                                    |       |       |       |      |      |
|------------------------|------------------------------------|-------|-------|-------|------|------|
| Cofactors and Vitamins | bilirubin (E,E)*                   | -0.56 | -1.09 | -0.04 | 0.04 | 0.32 |
| Cofactors and Vitamins | pyridoxal                          | -0.44 | -0.85 | -0.03 | 0.04 | 0.32 |
| Cofactors and Vitamins | pantoate                           | -0.46 | -0.94 | 0.03  | 0.06 | 0.38 |
| Cofactors and Vitamins | beta-cryptoxanthin                 | -0.18 | -0.39 | 0.02  | 0.07 | 0.40 |
| Cofactors and Vitamins | carotene diol (1)                  | 0.10  | -0.01 | 0.21  | 0.08 | 0.40 |
| Cofactors and Vitamins | gamma-CEHC glucuronide*            | -0.10 | -0.23 | 0.03  | 0.11 | 0.49 |
| Cofactors and Vitamins | l-urobilinogen                     | -0.18 | -0.41 | 0.05  | 0.11 | 0.49 |
| Cofactors and Vitamins | gulonate*                          | -0.23 | -0.53 | 0.07  | 0.13 | 0.51 |
| Cofactors and Vitamins | trigonelline (N'-methylnicotinate) | -0.09 | -0.21 | 0.03  | 0.13 | 0.51 |
| Cofactors and Vitamins | pantothenate                       | -0.12 | -0.29 | 0.05  | 0.15 | 0.54 |
| Cofactors and Vitamins | carotene diol (3)                  | 0.10  | -0.05 | 0.26  | 0.18 | 0.56 |
| Cofactors and Vitamins | alpha-CEHC glucuronide*            | -0.11 | -0.27 | 0.05  | 0.18 | 0.56 |
| Cofactors and Vitamins | ascorbic acid 2-sulfate            | -0.31 | -0.81 | 0.19  | 0.20 | 0.57 |
| Cofactors and Vitamins | alpha-CMBHC glucuronide            | -0.07 | -0.19 | 0.05  | 0.21 | 0.59 |
| Cofactors and Vitamins | alpha-CEHC sulfate                 | -0.09 | -0.23 | 0.06  | 0.22 | 0.60 |
| Cofactors and Vitamins | delta-CEHC                         | -0.05 | -0.13 | 0.03  | 0.25 | 0.61 |
| Cofactors and Vitamins | ascorbic acid 3-sulfate*           | -0.09 | -0.25 | 0.07  | 0.25 | 0.61 |
| Cofactors and Vitamins | retinol (vitamin A)                | -0.11 | -0.31 | 0.09  | 0.26 | 0.62 |
| Cofactors and Vitamins | heme                               | 2.27  | -2.20 | 6.74  | 0.30 | 0.65 |
| Cofactors and Vitamins | carotene diol (2)                  | 0.08  | -0.09 | 0.24  | 0.33 | 0.67 |
| Cofactors and Vitamins | flavin adenine dinucleotide (FAD)  | -0.20 | -0.69 | 0.29  | 0.39 | 0.70 |

|                        |                                    |       |       |       |      |      |
|------------------------|------------------------------------|-------|-------|-------|------|------|
| Cofactors and Vitamins | retinal                            | -0.24 | -0.89 | 0.41  | 0.44 | 0.73 |
| Cofactors and Vitamins | N1-methyl-2-pyridone-5-carboxamide | -0.05 | -0.19 | 0.09  | 0.45 | 0.73 |
| Cofactors and Vitamins | threonate                          | -0.10 | -0.38 | 0.18  | 0.46 | 0.74 |
| Cofactors and Vitamins | 2-O-methylascorbic acid            | -0.04 | -0.18 | 0.09  | 0.52 | 0.77 |
| Cofactors and Vitamins | bilirubin (E,Z or Z,E)*            | 0.09  | -0.21 | 0.40  | 0.53 | 0.77 |
| Cofactors and Vitamins | biliverdin                         | -0.06 | -0.29 | 0.17  | 0.58 | 0.81 |
| Cofactors and Vitamins | bilirubin (Z,Z)                    | -0.06 | -0.29 | 0.17  | 0.59 | 0.81 |
| Cofactors and Vitamins | pyridoxate                         | -0.02 | -0.17 | 0.12  | 0.73 | 0.88 |
| Cofactors and Vitamins | 1-methylnicotinamide               | -0.05 | -0.32 | 0.23  | 0.73 | 0.88 |
| Cofactors and Vitamins | quinolinate                        | 0.03  | -0.16 | 0.21  | 0.76 | 0.90 |
| Cofactors and Vitamins | gamma-tocopherol/beta-tocopherol   | 0.02  | -0.13 | 0.17  | 0.81 | 0.92 |
| Cofactors and Vitamins | alpha-tocopherol                   | -0.03 | -0.32 | 0.25  | 0.81 | 0.92 |
| Cofactors and Vitamins | oxalate (ethanedioate)             | 0.00  | -0.22 | 0.21  | 0.96 | 0.99 |
| Cofactors and Vitamins | delta-tocopherol                   | 0.00  | -0.09 | 0.09  | 1.00 | 1.00 |
| Energy                 | fumarate                           | -0.38 | -0.66 | -0.09 | 0.01 | 0.16 |
| Energy                 | malate                             | -0.21 | -0.37 | -0.04 | 0.02 | 0.20 |
| Energy                 | alpha-ketoglutarate                | -0.23 | -0.65 | 0.19  | 0.27 | 0.63 |
| Energy                 | succinate                          | -0.12 | -0.39 | 0.16  | 0.38 | 0.70 |
| Energy                 | citrate                            | -0.46 | -1.55 | 0.64  | 0.39 | 0.70 |
| Energy                 | citraconate/glutaconate            | 0.07  | -0.14 | 0.27  | 0.50 | 0.76 |
| Energy                 | 2-methylcitrate/homocitrate        | -0.13 | -0.52 | 0.27  | 0.50 | 0.76 |
| Energy                 | phosphate                          | -0.05 | -0.21 | 0.11  | 0.52 | 0.77 |
| Energy                 | aconitate [cis or trans]           | -0.03 | -0.30 | 0.23  | 0.79 | 0.92 |
| Energy                 | isocitric lactone                  | 0.03  | -0.19 | 0.24  | 0.80 | 0.92 |

|        |                                             |       |       |       |      |      |
|--------|---------------------------------------------|-------|-------|-------|------|------|
| Energy | succinylcarnitine (C4-DC)                   | 0.03  | -0.30 | 0.37  | 0.83 | 0.93 |
| Lipid  | 3-hydroxydecanoate                          | -0.69 | -0.89 | -0.48 | 0.00 | 0.00 |
| Lipid  | tetradecadienoate (14:2)*                   | -0.66 | -0.88 | -0.43 | 0.00 | 0.00 |
| Lipid  | dodecadienoate (12:2)*                      | -0.63 | -0.85 | -0.42 | 0.00 | 0.00 |
| Lipid  | octanoylcarnitine (C8)                      | -0.40 | -0.54 | -0.26 | 0.00 | 0.00 |
| Lipid  | 3-hydroxylaurate                            | -0.60 | -0.82 | -0.38 | 0.00 | 0.00 |
| Lipid  | 3-hydroxydecanoylcarnitine                  | -0.68 | -0.93 | -0.44 | 0.00 | 0.00 |
| Lipid  | hexadecadienoate (16:2n6)                   | -1.14 | -1.56 | -0.71 | 0.00 | 0.01 |
| Lipid  | 16-hydroxypalmitate                         | -0.53 | -0.74 | -0.32 | 0.00 | 0.01 |
| Lipid  | linolenate [alpha or gamma; (18:3n3 or 6)]  | -1.06 | -1.48 | -0.64 | 0.00 | 0.01 |
| Lipid  | laurate (12:0)                              | -0.89 | -1.24 | -0.53 | 0.00 | 0.01 |
| Lipid  | hexanoylcarnitine (C6)                      | -0.44 | -0.62 | -0.26 | 0.00 | 0.01 |
| Lipid  | (12 or 13)-methylmyristate (a15:0 or i15:0) | -0.85 | -1.20 | -0.50 | 0.00 | 0.01 |
| Lipid  | palmitoleate (16:1n7)                       | -1.17 | -1.66 | -0.68 | 0.00 | 0.01 |
| Lipid  | myristate (14:0)                            | -0.77 | -1.09 | -0.45 | 0.00 | 0.01 |
| Lipid  | caprate (10:0)                              | -0.73 | -1.04 | -0.42 | 0.00 | 0.01 |
| Lipid  | myristoleate (14:1n5)                       | -0.83 | -1.19 | -0.47 | 0.00 | 0.01 |
| Lipid  | linoleate (18:2n6)                          | -1.19 | -1.71 | -0.67 | 0.00 | 0.01 |
| Lipid  | pentadecanoate (15:0)                       | -1.39 | -2.00 | -0.78 | 0.00 | 0.01 |
| Lipid  | 3-hydroxyoctanoylcarnitine (1)              | -0.43 | -0.62 | -0.24 | 0.00 | 0.01 |
| Lipid  | 10-heptadecenoate (17:1n7)                  | -1.91 | -2.77 | -1.05 | 0.00 | 0.01 |
| Lipid  | oleate/vaccenate (18:1)                     | -1.27 | -1.84 | -0.70 | 0.00 | 0.01 |
| Lipid  | 3-hydroxyoctanoate                          | -0.42 | -0.62 | -0.23 | 0.00 | 0.02 |
| Lipid  | laurylcarnitine (C12)                       | -0.48 | -0.69 | -0.26 | 0.00 | 0.02 |
| Lipid  | myristoleoylcarnitine (C14:1)*              | -0.50 | -0.74 | -0.27 | 0.00 | 0.02 |
| Lipid  | decanoylcarnitine (C10)                     | -0.38 | -0.57 | -0.20 | 0.00 | 0.02 |
| Lipid  | 3-hydroxymyristate                          | -0.30 | -0.45 | -0.16 | 0.00 | 0.02 |
| Lipid  | stearidonate (18:4n3)                       | -0.53 | -0.80 | -0.27 | 0.00 | 0.03 |
| Lipid  | 2-hydroxydecanoate                          | -0.56 | -0.84 | -0.28 | 0.00 | 0.03 |
| Lipid  | 1-margaroylglycerol (17:0)                  | -0.99 | -1.48 | -0.49 | 0.00 | 0.03 |

|       |                                             |       |       |       |      |      |
|-------|---------------------------------------------|-------|-------|-------|------|------|
| Lipid | palmitate (16:0)                            | -1.27 | -1.92 | -0.62 | 0.00 | 0.03 |
| Lipid | (2 or 3)-decenoate (10:1n7 or n8)           | -0.56 | -0.85 | -0.27 | 0.00 | 0.03 |
| Lipid | margarate (17:0)                            | -1.00 | -1.52 | -0.48 | 0.00 | 0.03 |
| Lipid | glycolithocholate                           | -0.46 | -0.70 | -0.22 | 0.00 | 0.03 |
| Lipid | 5-dodecenoylcarnitine (C12:1)               | -0.77 | -1.19 | -0.36 | 0.00 | 0.04 |
| Lipid | docosapentaenoate (n3 DPA; 22:5n3)          | -0.81 | -1.25 | -0.38 | 0.00 | 0.04 |
| Lipid | dihomo-linoleate (20:2n6)                   | -0.69 | -1.07 | -0.32 | 0.00 | 0.04 |
| Lipid | dodecanedioate (C12-DC)                     | -0.29 | -0.45 | -0.13 | 0.00 | 0.04 |
| Lipid | cis-4-decenoate (10:1n6)*                   | -0.65 | -1.01 | -0.29 | 0.00 | 0.04 |
| Lipid | 10-nonadecenoate (19:1n9)                   | -0.49 | -0.76 | -0.22 | 0.00 | 0.04 |
| Lipid | hexanoylglycine                             | -0.19 | -0.30 | -0.08 | 0.00 | 0.05 |
| Lipid | cis-4-decenoylcarnitine (C10:1)             | -0.49 | -0.77 | -0.21 | 0.00 | 0.05 |
| Lipid | 12,13-DiHOME                                | -0.58 | -0.91 | -0.25 | 0.00 | 0.05 |
| Lipid | (14 or 15)-methylpalmitate (a17:0 or i17:0) | -0.46 | -0.72 | -0.19 | 0.00 | 0.05 |
| Lipid | eicosapentaenoate (EPA; 20:5n3)             | -0.54 | -0.85 | -0.23 | 0.00 | 0.05 |
| Lipid | estrone 3-sulfate                           | -0.19 | -0.30 | -0.08 | 0.00 | 0.06 |
| Lipid | tauroolithocholate 3-sulfate                | -0.17 | -0.27 | -0.07 | 0.00 | 0.06 |
| Lipid | nonanoylcarnitine (C9)                      | -0.30 | -0.48 | -0.12 | 0.00 | 0.06 |
| Lipid | glycoursodeoxycholate                       | -0.29 | -0.46 | -0.11 | 0.00 | 0.07 |
| Lipid | tetradecanedioate (C14-DC)                  | -0.32 | -0.51 | -0.12 | 0.00 | 0.07 |
| Lipid | 2-hydroxyoctanoate                          | -0.26 | -0.42 | -0.10 | 0.00 | 0.07 |
| Lipid | adrenate (22:4n6)                           | -0.85 | -1.37 | -0.33 | 0.00 | 0.07 |
| Lipid | dihomo-linolenate (20:3n3 or n6)            | -0.63 | -1.01 | -0.24 | 0.00 | 0.07 |
| Lipid | butyrylcarnitine (C4)                       | -0.19 | -0.31 | -0.07 | 0.00 | 0.08 |
| Lipid | docosadienoate (22:2n6)                     | -0.41 | -0.66 | -0.15 | 0.00 | 0.08 |
| Lipid | taurochenodeoxycholic acid 3-sulfate        | -0.11 | -0.18 | -0.04 | 0.00 | 0.09 |
| Lipid | 5-dodecenoate (12:1n7)                      | -0.56 | -0.93 | -0.20 | 0.00 | 0.09 |
| Lipid | docosatrienoate (22:3n3)                    | -0.30 | -0.50 | -0.10 | 0.01 | 0.10 |
| Lipid | eicosenoate (20:1)                          | -0.68 | -1.13 | -0.23 | 0.01 | 0.10 |
| Lipid | 3-hydroxyoctanoylcarnitine (2)              | -0.40 | -0.66 | -0.13 | 0.01 | 0.10 |

|       |                                           |       |       |       |      |      |
|-------|-------------------------------------------|-------|-------|-------|------|------|
| Lipid | taurochenodeoxycholate                    | -0.59 | -0.99 | -0.20 | 0.01 | 0.11 |
| Lipid | docosahexaenoate (DHA; 22:6n3)            | -0.53 | -0.89 | -0.17 | 0.01 | 0.11 |
| Lipid | heneicosapentaenoate (21:5n3)             | -0.42 | -0.70 | -0.14 | 0.01 | 0.11 |
| Lipid | hexadecanedioate (C16-DC)                 | -0.31 | -0.52 | -0.10 | 0.01 | 0.11 |
| Lipid | dodecenedioate (C12:1-DC)*                | -0.26 | -0.43 | -0.08 | 0.01 | 0.11 |
| Lipid | 3-hydroxydodecanedioate*                  | -0.32 | -0.54 | -0.10 | 0.01 | 0.12 |
| Lipid | 1-linoleoyl-2-linolenoyl-GPC (18:2/18:3)* | -0.53 | -0.90 | -0.16 | 0.01 | 0.12 |
| Lipid | glycolithocholate sulfate*                | -0.12 | -0.20 | -0.03 | 0.01 | 0.14 |
| Lipid | 3-hydroxybutyrate (BHBA)                  | -0.43 | -0.75 | -0.12 | 0.01 | 0.15 |
| Lipid | glycocholate                              | -0.31 | -0.53 | -0.08 | 0.01 | 0.15 |
| Lipid | 1,2-dilinoleoyl-GPC (18:2/18:2)           | -0.37 | -0.64 | -0.10 | 0.01 | 0.15 |
| Lipid | palmitoleoylcarnitine (C16:1)*            | -0.32 | -0.56 | -0.08 | 0.01 | 0.15 |
| Lipid | 9-hydroxystearate                         | -0.33 | -0.57 | -0.08 | 0.01 | 0.15 |
| Lipid | stearate (18:0)                           | -0.77 | -1.35 | -0.19 | 0.01 | 0.16 |
| Lipid | glycerol                                  | -0.59 | -1.04 | -0.15 | 0.01 | 0.16 |
| Lipid | N-palmitoyltaurine                        | 0.52  | 0.12  | 0.92  | 0.01 | 0.18 |
| Lipid | hexadecenedioate (C16:1-DC)*              | -0.17 | -0.31 | -0.04 | 0.01 | 0.18 |
| Lipid | 1-linoleoyl-GPA (18:2)*                   | -0.45 | -0.80 | -0.10 | 0.01 | 0.18 |
| Lipid | docosatrienoate (22:3n6)*                 | -0.44 | -0.78 | -0.10 | 0.01 | 0.18 |
| Lipid | arachidonate (20:4n6)                     | -1.04 | -1.84 | -0.23 | 0.01 | 0.18 |
| Lipid | 10-undecenoate (11:1n1)                   | -0.17 | -0.31 | -0.04 | 0.02 | 0.18 |
| Lipid | butyrate/isobutyrate (4:0)                | -0.33 | -0.59 | -0.07 | 0.02 | 0.18 |
| Lipid | tetradecadienedioate (C14:2-DC)*          | -0.16 | -0.29 | -0.03 | 0.02 | 0.19 |
| Lipid | glycodeoxycholate                         | -0.20 | -0.35 | -0.04 | 0.02 | 0.20 |
| Lipid | pristanate                                | -0.38 | -0.68 | -0.08 | 0.02 | 0.20 |
| Lipid | tauro-beta-muricholate                    | -0.14 | -0.25 | -0.03 | 0.02 | 0.20 |
| Lipid | N-octanoylglycine                         | -0.34 | -0.62 | -0.06 | 0.02 | 0.21 |
| Lipid | 2-hydroxylaurate                          | -0.27 | -0.50 | -0.05 | 0.02 | 0.21 |
| Lipid | glycohyocholate                           | -0.27 | -0.49 | -0.05 | 0.02 | 0.21 |
| Lipid | myristoylcarnitine (C14)                  | -0.21 | -0.39 | -0.04 | 0.02 | 0.21 |

|       |                                                        |       |       |       |      |      |
|-------|--------------------------------------------------------|-------|-------|-------|------|------|
| Lipid | phosphoethanolamine                                    | -0.45 | -0.82 | -0.08 | 0.02 | 0.21 |
| Lipid | nonadecanoate (19:0)                                   | -0.57 | -1.06 | -0.09 | 0.02 | 0.23 |
| Lipid | linoleoyl ethanolamide                                 | -0.45 | -0.84 | -0.06 | 0.03 | 0.24 |
| Lipid | taurodeoxycholic acid 3-sulfate                        | -0.20 | -0.38 | -0.02 | 0.03 | 0.26 |
| Lipid | trans-2-hexenoylglycine                                | -0.23 | -0.43 | -0.02 | 0.03 | 0.28 |
| Lipid | docosapentaenoate (n6 DPA; 22:5n6)                     | -0.41 | -0.77 | -0.04 | 0.03 | 0.29 |
| Lipid | 3beta-hydroxy-5-cholenoate                             | -0.24 | -0.46 | -0.02 | 0.03 | 0.30 |
| Lipid | isoursodeoxycholate                                    | -0.06 | -0.12 | 0.00  | 0.04 | 0.31 |
| Lipid | 1-(1-enyl-palmitoyl)-2-linoleoyl-GPC (P-16:0/18:2)*    | -0.13 | -0.26 | -0.01 | 0.04 | 0.31 |
| Lipid | 5-hydroxyhexanoate                                     | -0.40 | -0.77 | -0.02 | 0.04 | 0.32 |
| Lipid | 5alpha-androstan-3alpha,17beta-diol monosulfate (1)    | -0.06 | -0.12 | 0.00  | 0.04 | 0.32 |
| Lipid | 1-stearoyl-2-oleoyl-GPE (18:0/18:1)                    | -0.23 | -0.44 | -0.01 | 0.04 | 0.32 |
| Lipid | N-linoleoylglycine                                     | -0.44 | -0.87 | -0.02 | 0.04 | 0.32 |
| Lipid | 1-oleoyl-2-linoleoyl-GPE (18:1/18:2)*                  | -0.21 | -0.42 | -0.01 | 0.04 | 0.33 |
| Lipid | 7alpha-hydroxy-3-oxo-4-cholestenoate (7-Hoca)          | -0.24 | -0.47 | -0.01 | 0.04 | 0.33 |
| Lipid | 5alpha-pregnan-3beta,20alpha-diol monosulfate (2)      | -0.10 | -0.19 | 0.00  | 0.04 | 0.33 |
| Lipid | sphingomyelin (d18:2/14:0, d18:1/14:1)*                | -0.20 | -0.39 | 0.00  | 0.05 | 0.33 |
| Lipid | 3-hydroxysebacate                                      | -0.15 | -0.31 | 0.00  | 0.05 | 0.34 |
| Lipid | myo-inositol                                           | -0.39 | -0.77 | 0.00  | 0.05 | 0.35 |
| Lipid | sphingomyelin (d17:1/14:0, d16:1/15:0)*                | -0.16 | -0.32 | 0.00  | 0.05 | 0.35 |
| Lipid | glycochenodeoxycholate                                 | -0.23 | -0.45 | 0.00  | 0.05 | 0.35 |
| Lipid | N-oleoyltaurine                                        | -0.25 | -0.50 | 0.00  | 0.05 | 0.35 |
| Lipid | 5alpha-pregnan-3beta,20beta-diol monosulfate (1)       | -0.11 | -0.22 | 0.00  | 0.05 | 0.36 |
| Lipid | 1-stearoyl-2-dihomo-linolenoyl-GPE (18:0/20:3n3 or 6)* | -0.14 | -0.28 | 0.00  | 0.06 | 0.36 |
| Lipid | 21-hydroxypregnenolone monosulfate (1)                 | 0.26  | -0.01 | 0.52  | 0.06 | 0.37 |
| Lipid | 9,10-DiHOME                                            | -0.18 | -0.36 | 0.01  | 0.06 | 0.37 |
| Lipid | lithocholate sulfate (1)                               | -0.14 | -0.29 | 0.01  | 0.06 | 0.38 |
| Lipid | glycodeoxycholate 3-sulfate                            | -0.10 | -0.20 | 0.00  | 0.06 | 0.38 |
| Lipid | sphingomyelin (d18:1/20:0, d16:1/22:0)*                | -0.37 | -0.75 | 0.02  | 0.06 | 0.38 |
| Lipid | glyco-beta-muricholate**                               | -0.13 | -0.27 | 0.01  | 0.06 | 0.38 |

|       |                                                           |       |       |      |      |      |
|-------|-----------------------------------------------------------|-------|-------|------|------|------|
| Lipid | octadecenedioate (C18:1-DC)                               | -0.11 | -0.22 | 0.01 | 0.06 | 0.38 |
| Lipid | taurodeoxycholate                                         | -0.28 | -0.58 | 0.02 | 0.06 | 0.38 |
| Lipid | sebacate (C10-DC)                                         | -0.20 | -0.40 | 0.01 | 0.06 | 0.39 |
| Lipid | ursodeoxycholate                                          | -0.18 | -0.37 | 0.01 | 0.06 | 0.39 |
| Lipid | alpha-hydroxycaproate                                     | 0.51  | -0.04 | 1.06 | 0.07 | 0.39 |
| Lipid | 1-palmitoyl-2-palmitoleoyl-GPE (16:0/16:1)*               | -0.18 | -0.37 | 0.01 | 0.07 | 0.39 |
| Lipid | 3beta-hydroxy-5-cholestenoate                             | -0.34 | -0.71 | 0.03 | 0.07 | 0.40 |
| Lipid | glutarate (C5-DC)                                         | -0.11 | -0.24 | 0.01 | 0.07 | 0.40 |
| Lipid | choline phosphate                                         | -0.33 | -0.70 | 0.04 | 0.08 | 0.40 |
| Lipid | taurocholate                                              | -0.15 | -0.33 | 0.02 | 0.08 | 0.40 |
| Lipid | glycocholate glucuronide (1)                              | -0.13 | -0.28 | 0.02 | 0.08 | 0.41 |
| Lipid | octadecenedioylcarnitine (C18:1-DC)*                      | -0.09 | -0.18 | 0.01 | 0.08 | 0.41 |
| Lipid | 1-myristoyl-2-palmitoyl-GPC (14:0/16:0)                   | -0.14 | -0.31 | 0.02 | 0.09 | 0.43 |
| Lipid | 1-margaroyl-2-arachidonoyl-GPC (17:0/20:4)*               | -0.17 | -0.38 | 0.03 | 0.09 | 0.43 |
| Lipid | linoleoylcarnitine (C18:2)*                               | -0.24 | -0.51 | 0.04 | 0.09 | 0.44 |
| Lipid | glycosyl-N-behenoyl-sphingadienine (d18:2/22:0)*          | -0.23 | -0.51 | 0.05 | 0.10 | 0.46 |
| Lipid | glycochenodeoxycholate 3-sulfate                          | -0.07 | -0.15 | 0.01 | 0.10 | 0.46 |
| Lipid | glycosyl-N-palmitoyl-sphingosine (d18:1/16:0)             | -0.21 | -0.45 | 0.04 | 0.10 | 0.46 |
| Lipid | propionylcarnitine (C3)                                   | -0.13 | -0.29 | 0.03 | 0.10 | 0.47 |
| Lipid | eicosenedioate (C20:1-DC)*                                | -0.16 | -0.35 | 0.04 | 0.10 | 0.47 |
| Lipid | androstenediol (3beta,17beta) monosulfate (1)             | -0.04 | -0.09 | 0.01 | 0.10 | 0.47 |
| Lipid | tauroursodeoxycholate                                     | -0.24 | -0.55 | 0.06 | 0.10 | 0.47 |
| Lipid | 1-(1-enyl-palmitoyl)-2-oleoyl-GPC (P-16:0/18:1)*          | -0.14 | -0.31 | 0.03 | 0.11 | 0.48 |
| Lipid | heptanoate (7:0)                                          | -0.37 | -0.82 | 0.09 | 0.11 | 0.48 |
| Lipid | 1-stearoyl-2-dihomo-linolenoyl-GPC (18:0/20:3n3 or 6)*    | -0.10 | -0.23 | 0.03 | 0.11 | 0.49 |
| Lipid | palmitoyl dihydrosphingomyelin (d18:0/16:0)*              | -0.20 | -0.46 | 0.05 | 0.11 | 0.49 |
| Lipid | 1-palmitoyl-GPE (O-16:0)*                                 | 0.22  | -0.06 | 0.51 | 0.11 | 0.49 |
| Lipid | 1-(1-enyl-palmitoyl)-2-docosahexaenoyl-GPC (P-16:0/22:6)* | -0.11 | -0.26 | 0.03 | 0.12 | 0.49 |
| Lipid | androstenediol (3alpha, 17alpha) monosulfate (3)          | -0.03 | -0.07 | 0.01 | 0.12 | 0.51 |
| Lipid | 1-pentadecanoyl-2-linoleoyl-GPC (15:0/18:2)*              | -0.15 | -0.35 | 0.05 | 0.12 | 0.51 |

|       |                                                     |       |       |      |      |      |
|-------|-----------------------------------------------------|-------|-------|------|------|------|
| Lipid | sphingomyelin (d18:2/16:0, d18:1/16:1)*             | -0.24 | -0.55 | 0.07 | 0.12 | 0.51 |
| Lipid | 3-hydroxyadipate                                    | -0.33 | -0.76 | 0.10 | 0.12 | 0.51 |
| Lipid | 2-stearoyl-GPE (18:0)*                              | -0.35 | -0.81 | 0.11 | 0.12 | 0.51 |
| Lipid | N-acetyl-2-aminooctanoate*                          | 0.13  | -0.04 | 0.30 | 0.13 | 0.51 |
| Lipid | pregnenediol sulfate (C21H34O5S)*                   | -0.08 | -0.19 | 0.03 | 0.13 | 0.51 |
| Lipid | suberoylcarnitine (C8-DC)                           | 0.12  | -0.04 | 0.29 | 0.13 | 0.52 |
| Lipid | deoxycholic acid 12-sulfate*                        | -0.11 | -0.26 | 0.04 | 0.13 | 0.52 |
| Lipid | N-palmitoylglycine                                  | -0.27 | -0.63 | 0.09 | 0.13 | 0.52 |
| Lipid | arachidate (20:0)                                   | -0.27 | -0.64 | 0.09 | 0.13 | 0.52 |
| Lipid | 1-palmitoyl-2-eicosapentaenoyl-GPE (16:0/20:5)*     | -0.12 | -0.29 | 0.04 | 0.13 | 0.52 |
| Lipid | ceramide (d18:1/14:0, d16:1/16:0)*                  | -0.16 | -0.37 | 0.06 | 0.14 | 0.52 |
| Lipid | 1-palmitoyl-2-linoleoyl-GPE (16:0/18:2)             | -0.14 | -0.33 | 0.05 | 0.14 | 0.52 |
| Lipid | octadecanedioate (C18-DC)                           | -0.17 | -0.41 | 0.06 | 0.14 | 0.52 |
| Lipid | glycosyl-N-stearoyl-sphingosine (d18:1/18:0)        | -0.24 | -0.57 | 0.09 | 0.14 | 0.52 |
| Lipid | cholate                                             | -0.30 | -0.72 | 0.12 | 0.15 | 0.54 |
| Lipid | 1-myristoyl-2-arachidonoyl-GPC (14:0/20:4)*         | -0.07 | -0.18 | 0.03 | 0.15 | 0.54 |
| Lipid | dihomo-linolenoylcarnitine (C20:3n3 or 6)*          | -0.22 | -0.54 | 0.09 | 0.16 | 0.54 |
| Lipid | 1-eicosenoyl-GPE (20:1)*                            | -0.36 | -0.88 | 0.16 | 0.16 | 0.54 |
| Lipid | 1-stearoyl-2-linoleoyl-GPE (18:0/18:2)*             | -0.11 | -0.26 | 0.05 | 0.16 | 0.54 |
| Lipid | linoleoyl-linolenoyl-glycerol (18:2/18:3) [2]*      | -0.22 | -0.54 | 0.10 | 0.16 | 0.54 |
| Lipid | 1,2-dilinoeoyl-GPE (18:2/18:2)*                     | -0.29 | -0.71 | 0.13 | 0.16 | 0.55 |
| Lipid | butyrylglycine                                      | -0.09 | -0.21 | 0.04 | 0.16 | 0.55 |
| Lipid | 1-lignoceroyl-GPC (24:0)                            | -0.18 | -0.44 | 0.08 | 0.17 | 0.55 |
| Lipid | 1-palmitoyl-2-palmitoleoyl-GPC (16:0/16:1)*         | -0.09 | -0.23 | 0.04 | 0.17 | 0.55 |
| Lipid | sphingomyelin (d17:1/16:0, d18:1/15:0, d16:1/17:0)* | -0.19 | -0.46 | 0.09 | 0.17 | 0.55 |
| Lipid | 1-palmitoyl-2-arachidonoyl-GPC (16:0/20:4n6)        | -0.12 | -0.30 | 0.06 | 0.17 | 0.56 |
| Lipid | 1-linoleoyl-GPG (18:2)*                             | -0.31 | -0.77 | 0.15 | 0.17 | 0.56 |
| Lipid | 1-(1-enyl-palmitoyl)-2-linoleoyl-GPE (P-16:0/18:2)* | -0.11 | -0.28 | 0.05 | 0.17 | 0.56 |
| Lipid | oleoylcarnitine (C18:1)                             | -0.20 | -0.49 | 0.10 | 0.17 | 0.56 |
| Lipid | azelate (C9-DC)                                     | 0.48  | -0.23 | 1.18 | 0.17 | 0.56 |

|       |                                                          |       |       |      |      |      |
|-------|----------------------------------------------------------|-------|-------|------|------|------|
| Lipid | 13-HODE + 9-HODE                                         | -0.29 | -0.72 | 0.14 | 0.17 | 0.56 |
| Lipid | caproate (6:0)                                           | -0.20 | -0.49 | 0.10 | 0.17 | 0.56 |
| Lipid | carnitine                                                | -0.36 | -0.89 | 0.18 | 0.17 | 0.56 |
| Lipid | 1-(1-enyl-stearoyl)-2-linoleoyl-GPE (P-18:0/18:2)*       | -0.11 | -0.27 | 0.05 | 0.17 | 0.56 |
| Lipid | 5alpha-androstan-3beta,17beta-diol monosulfate (2)       | -0.05 | -0.13 | 0.03 | 0.18 | 0.56 |
| Lipid | 1-margaroyl-GPE (17:0)*                                  | -0.30 | -0.75 | 0.15 | 0.18 | 0.56 |
| Lipid | cis-3,4-methyleneheptanoylglycine                        | -0.11 | -0.29 | 0.06 | 0.18 | 0.56 |
| Lipid | (R)-3-hydroxybutyrylcarnitine                            | 0.39  | -0.21 | 0.99 | 0.19 | 0.56 |
| Lipid | 3beta,7alpha-dihydroxy-5-cholestenoate                   | -0.32 | -0.82 | 0.17 | 0.19 | 0.56 |
| Lipid | 1-arachidoyl-GPC (20:0)                                  | 0.07  | -0.04 | 0.18 | 0.19 | 0.56 |
| Lipid | sphingomyelin (d18:1/22:2, d18:2/22:1, d16:1/24:2)*      | -0.13 | -0.33 | 0.07 | 0.19 | 0.56 |
| Lipid | 3-hydroxybutyrylglycine**                                | 0.12  | -0.07 | 0.30 | 0.20 | 0.56 |
| Lipid | 5alpha-androstan-3alpha,17alpha-diol monosulfate         | -0.10 | -0.26 | 0.06 | 0.20 | 0.56 |
| Lipid | tridecenedioate (C13:1-DC)*                              | -0.11 | -0.29 | 0.07 | 0.20 | 0.57 |
| Lipid | dihomo-linolenoyl-choline                                | 0.49  | -0.29 | 1.27 | 0.20 | 0.57 |
| Lipid | arachidoylcarnitine (C20)*                               | -0.32 | -0.83 | 0.20 | 0.21 | 0.58 |
| Lipid | 2-arachidonoylglycerol (20:4)                            | 0.26  | -0.16 | 0.67 | 0.21 | 0.58 |
| Lipid | corticosterone                                           | 0.39  | -0.24 | 1.02 | 0.21 | 0.58 |
| Lipid | 1-stearoyl-2-arachidonoyl-GPS (18:0/20:4)                | -0.34 | -0.90 | 0.22 | 0.21 | 0.58 |
| Lipid | 1-margaroyl-2-linoleoyl-GPC (17:0/18:2)*                 | -0.19 | -0.49 | 0.12 | 0.22 | 0.59 |
| Lipid | 1-(1-enyl-palmitoyl)-2-arachidonoyl-GPC (P-16:0/20:4)*   | -0.09 | -0.24 | 0.06 | 0.22 | 0.59 |
| Lipid | 1-palmitoyl-2-pentadecanoyl-GPC (16:0/15:0)*             | -0.20 | -0.53 | 0.13 | 0.22 | 0.59 |
| Lipid | glycosyl ceramide (d18:1/20:0, d16:1/22:0)*              | -0.20 | -0.52 | 0.13 | 0.22 | 0.59 |
| Lipid | stearoyl sphingomyelin (d18:1/18:0)                      | -0.16 | -0.44 | 0.11 | 0.22 | 0.60 |
| Lipid | 1-stearoyl-2-linoleoyl-GPC (18:0/18:2)*                  | -0.17 | -0.45 | 0.11 | 0.22 | 0.60 |
| Lipid | glycocholate sulfate                                     | -0.02 | -0.07 | 0.02 | 0.23 | 0.60 |
| Lipid | N-palmitoyl-sphingadienine (d18:2/16:0)*                 | -0.25 | -0.68 | 0.18 | 0.23 | 0.60 |
| Lipid | 1-(1-enyl-stearoyl)-2-docosahexaenoyl-GPE (P-18:0/22:6)* | -0.11 | -0.31 | 0.08 | 0.23 | 0.60 |
| Lipid | linoleoyl-linoleoyl-glycerol (18:2/18:2) [2]*            | 0.19  | -0.13 | 0.50 | 0.23 | 0.60 |
| Lipid | 1-(1-enyl-stearoyl)-GPE (P-18:0)*                        | 0.23  | -0.16 | 0.63 | 0.23 | 0.60 |

|       |                                                                 |       |       |      |      |      |
|-------|-----------------------------------------------------------------|-------|-------|------|------|------|
| Lipid | oleoyl ethanolamide                                             | -0.43 | -1.15 | 0.30 | 0.23 | 0.60 |
| Lipid | propionylglycine                                                | -0.34 | -0.91 | 0.24 | 0.23 | 0.60 |
| Lipid | cortisol                                                        | 0.24  | -0.18 | 0.66 | 0.24 | 0.60 |
| Lipid | 1-pentadecanoyl-2-arachidonoyl-GPC (15:0/20:4)*                 | -0.08 | -0.21 | 0.06 | 0.24 | 0.60 |
| Lipid | hydroxy-CMPF*                                                   | -0.04 | -0.11 | 0.03 | 0.24 | 0.60 |
| Lipid | cerotoylcarnitine (C26)*                                        | -0.13 | -0.36 | 0.10 | 0.24 | 0.60 |
| Lipid | cholic acid glucuronide                                         | -0.05 | -0.13 | 0.03 | 0.24 | 0.60 |
| Lipid | 1-palmitoyl-2-(hydroxylinoleoyl)-GPC (16:0/18:2(OH))*           | -0.35 | -0.98 | 0.27 | 0.25 | 0.61 |
| Lipid | (S)-3-hydroxybutyrylcarnitine                                   | -0.09 | -0.26 | 0.07 | 0.25 | 0.61 |
| Lipid | linoleoyl-arachidonoyl-glycerol (18:2/20:4) [1]*                | -0.16 | -0.44 | 0.12 | 0.25 | 0.62 |
| Lipid | 1-(1-enyl-palmitoyl)-2-palmitoyl-GPC (P-16:0/16:0)*             | -0.14 | -0.39 | 0.11 | 0.26 | 0.62 |
| Lipid | androstenediol (3beta,17beta) disulfate (2)                     | -0.06 | -0.17 | 0.05 | 0.26 | 0.63 |
| Lipid | taurocholate sulfate*                                           | -0.07 | -0.19 | 0.06 | 0.26 | 0.63 |
| Lipid | undecenoylcarnitine (C11:1)                                     | -0.14 | -0.39 | 0.12 | 0.27 | 0.63 |
| Lipid | palmitoyl sphingomyelin (d18:1/16:0)                            | -0.25 | -0.71 | 0.21 | 0.27 | 0.63 |
| Lipid | 1-arachidoyl-2-arachidonoyl-GPC (20:0/20:4)*                    | -0.24 | -0.69 | 0.21 | 0.27 | 0.63 |
| Lipid | methylmalonate (MMA)                                            | -0.22 | -0.63 | 0.19 | 0.27 | 0.63 |
| Lipid | oleoylcholine                                                   | 0.35  | -0.30 | 1.00 | 0.27 | 0.63 |
| Lipid | deoxycholate                                                    | -0.09 | -0.26 | 0.08 | 0.28 | 0.63 |
| Lipid | caprylate (8:0)                                                 | -0.23 | -0.68 | 0.21 | 0.28 | 0.64 |
| Lipid | docosadioate (C22-DC)                                           | 0.28  | -0.25 | 0.81 | 0.28 | 0.64 |
| Lipid | 1-stearoyl-GPG (18:0)                                           | -0.28 | -0.83 | 0.26 | 0.28 | 0.64 |
| Lipid | N-palmitoyl-sphingosine (d18:1/16:0)                            | -0.18 | -0.53 | 0.17 | 0.28 | 0.64 |
| Lipid | androsterone sulfate                                            | -0.07 | -0.19 | 0.06 | 0.28 | 0.64 |
| Lipid | 1-(1-enyl-palmitoyl)-2-docosahexaenoyl-GPE (P-16:0/22:6)*       | -0.09 | -0.27 | 0.09 | 0.29 | 0.64 |
| Lipid | sphingomyelin (d18:1/22:1, d18:2/22:0, d16:1/24:1)*             | -0.19 | -0.57 | 0.18 | 0.29 | 0.64 |
| Lipid | arachidonoylcarnitine (C20:4)                                   | -0.15 | -0.43 | 0.14 | 0.29 | 0.65 |
| Lipid | 3-carboxy-4-methyl-5-pentyl-2-furanpropionate (3-CMPFP)**       | -0.08 | -0.23 | 0.08 | 0.30 | 0.65 |
| Lipid | sphingomyelin (d18:1/25:0, d19:0/24:1, d20:1/23:0, d19:1/24:0)* | -0.07 | -0.22 | 0.07 | 0.30 | 0.65 |

|       |                                                  |       |       |      |      |      |
|-------|--------------------------------------------------|-------|-------|------|------|------|
| Lipid | sphingadienine                                   | 0.20  | -0.20 | 0.60 | 0.31 | 0.65 |
| Lipid | 1-palmitoyl-2-linoleoyl-GPI (16:0/18:2)          | 0.24  | -0.25 | 0.73 | 0.31 | 0.65 |
| Lipid | N-stearoyl-sphingosine (d18:1/18:0)*             | -0.11 | -0.34 | 0.12 | 0.31 | 0.66 |
| Lipid | 21-hydroxypregnenolone disulfate                 | 0.06  | -0.06 | 0.18 | 0.32 | 0.66 |
| Lipid | 1-palmitoyl-2-oleoyl-GPE (16:0/18:1)             | -0.12 | -0.36 | 0.13 | 0.32 | 0.67 |
| Lipid | 3-hydroxyoleate*                                 | -0.34 | -1.05 | 0.37 | 0.32 | 0.67 |
| Lipid | 1-stearyl-GPE (O-18:0)*                          | -0.09 | -0.28 | 0.10 | 0.32 | 0.67 |
| Lipid | trimethylamine N-oxide                           | -0.04 | -0.11 | 0.04 | 0.33 | 0.67 |
| Lipid | acetylcarnitine (C2)                             | -0.14 | -0.43 | 0.15 | 0.33 | 0.67 |
| Lipid | docosahexaenoylcholine                           | 0.23  | -0.27 | 0.74 | 0.34 | 0.68 |
| Lipid | 1-docosahexaenoyl-GPE (22:6)*                    | -0.13 | -0.41 | 0.15 | 0.34 | 0.68 |
| Lipid | (16 or 17)-methylstearate (a19:0 or i19:0)       | -0.06 | -0.19 | 0.07 | 0.34 | 0.68 |
| Lipid | 1-dihomo-linolenoyl-GPC (20:3n3 or 6)*           | 0.15  | -0.18 | 0.47 | 0.34 | 0.68 |
| Lipid | 1-palmityl-GPC (O-16:0)                          | 0.11  | -0.13 | 0.34 | 0.35 | 0.68 |
| Lipid | 1-stearoyl-2-docosapentaenoyl-GPC (18:0/22:5n3)* | -0.07 | -0.21 | 0.08 | 0.35 | 0.68 |
| Lipid | 1-arachidonoyl-GPC (20:4n6)*                     | 0.10  | -0.12 | 0.32 | 0.35 | 0.68 |
| Lipid | myristoyl dihydrosphingomyelin (d18:0/14:0)*     | -0.08 | -0.27 | 0.10 | 0.35 | 0.68 |
| Lipid | oleoyl-linoleoyl-glycerol (18:1/18:2) [1]        | -0.22 | -0.69 | 0.26 | 0.35 | 0.68 |
| Lipid | 1-stearoyl-2-docosapentaenoyl-GPC (18:0/22:5n6)* | -0.08 | -0.26 | 0.10 | 0.35 | 0.68 |
| Lipid | sphingomyelin (d18:1/18:1, d18:2/18:0)           | -0.12 | -0.38 | 0.15 | 0.35 | 0.69 |
| Lipid | lactosyl-N-palmitoyl-sphingosine (d18:1/16:0)    | -0.11 | -0.35 | 0.13 | 0.36 | 0.69 |
| Lipid | 1-palmitoleoylglycerol (16:1)*                   | 0.21  | -0.26 | 0.67 | 0.36 | 0.69 |
| Lipid | glycerophosphorylcholine (GPC)                   | 0.24  | -0.30 | 0.77 | 0.36 | 0.69 |
| Lipid | maleate                                          | -0.20 | -0.67 | 0.26 | 0.36 | 0.69 |
| Lipid | linoleoyl-linoleoyl-glycerol (18:2/18:2) [1]*    | -0.10 | -0.34 | 0.13 | 0.36 | 0.70 |
| Lipid | 1-stearoyl-GPI (18:0)                            | 0.31  | -0.40 | 1.03 | 0.37 | 0.70 |
| Lipid | epiandrosterone sulfite                          | -0.02 | -0.07 | 0.03 | 0.37 | 0.70 |
| Lipid | 1-oleoyl-GPE (18:1)                              | -0.12 | -0.38 | 0.15 | 0.37 | 0.70 |
| Lipid | 1-linoleoyl-2-arachidonoyl-GPE (18:2/20:4)*      | 0.15  | -0.20 | 0.51 | 0.37 | 0.70 |
| Lipid | 1-palmityl-2-linoleoyl-GPC (O-16:0/18:2)*        | -0.07 | -0.25 | 0.10 | 0.37 | 0.70 |

|       |                                                        |       |       |      |      |      |
|-------|--------------------------------------------------------|-------|-------|------|------|------|
| Lipid | 1-palmitoyl-2-docosahexaenoyl-GPE (16:0/22:6)*         | -0.07 | -0.25 | 0.10 | 0.37 | 0.70 |
| Lipid | 5alpha-pregnan-diol disulfate                          | 0.05  | -0.07 | 0.17 | 0.37 | 0.70 |
| Lipid | 1-palmitoyl-2-linoleoyl-GPC (16:0/18:2)                | -0.14 | -0.48 | 0.19 | 0.37 | 0.70 |
| Lipid | palmitoylcarnitine (C16)                               | -0.13 | -0.43 | 0.17 | 0.37 | 0.70 |
| Lipid | 1-(1-enyl-oleoyl)-GPE (P-18:1)*                        | -0.21 | -0.71 | 0.28 | 0.37 | 0.70 |
| Lipid | glycosyl ceramide (d18:2/24:1, d18:1/24:2)*            | -0.10 | -0.32 | 0.13 | 0.37 | 0.70 |
| Lipid | 1-palmitoleoyl-GPI (16:1)*                             | 0.09  | -0.12 | 0.31 | 0.38 | 0.70 |
| Lipid | stearoylcholine*                                       | 0.29  | -0.40 | 0.98 | 0.38 | 0.70 |
| Lipid | picolinoylglycine                                      | -0.09 | -0.29 | 0.12 | 0.38 | 0.70 |
| Lipid | sphingomyelin (d18:2/23:0, d18:1/23:1, d17:1/24:1)*    | -0.12 | -0.40 | 0.16 | 0.38 | 0.70 |
| Lipid | N-palmitoyl-sphinganine (d18:0/16:0)                   | -0.11 | -0.38 | 0.16 | 0.39 | 0.70 |
| Lipid | pregnanolone/allopregnanolone sulfate                  | 0.14  | -0.20 | 0.49 | 0.39 | 0.70 |
| Lipid | 1-oleoyl-2-docosahexaenoyl-GPC (18:1/22:6)*            | -0.07 | -0.25 | 0.10 | 0.39 | 0.70 |
| Lipid | 1-palmitoyl-2-eicosapentaenoyl-GPC (16:0/20:5)*        | -0.07 | -0.24 | 0.10 | 0.39 | 0.70 |
| Lipid | dihomo-linoleoylcarnitine (C20:2)*                     | -0.13 | -0.45 | 0.19 | 0.39 | 0.70 |
| Lipid | 1-palmitoyl-2-docosahexaenoyl-GPC (16:0/22:6)          | -0.07 | -0.23 | 0.09 | 0.39 | 0.70 |
| Lipid | 1-stearoyl-GPS (18:0)*                                 | 0.21  | -0.30 | 0.71 | 0.39 | 0.70 |
| Lipid | 1-(1-enyl-stearoyl)-2-oleoyl-GPE (P-18:0/18:1)         | -0.09 | -0.31 | 0.13 | 0.39 | 0.70 |
| Lipid | 1-stearoyl-GPE (18:0)                                  | 0.10  | -0.14 | 0.34 | 0.39 | 0.70 |
| Lipid | palmitoyl-sphingosine-phosphoethanolamine (d18:1/16:0) | -0.10 | -0.35 | 0.15 | 0.39 | 0.70 |
| Lipid | 1-pentadecanoyl-2-docosahexaenoyl-GPC (15:0/22:6)*     | -0.08 | -0.29 | 0.12 | 0.40 | 0.70 |
| Lipid | 1-palmitoyl-2-palmitoyl-GPC (O-16:0/16:0)*             | -0.17 | -0.58 | 0.25 | 0.40 | 0.70 |
| Lipid | sphinganine                                            | 0.38  | -0.56 | 1.32 | 0.40 | 0.70 |
| Lipid | chiro-inositol                                         | 0.48  | -0.70 | 1.67 | 0.40 | 0.70 |
| Lipid | sphingomyelin (d18:1/17:0, d17:1/18:0, d19:1/16:0)     | -0.14 | -0.49 | 0.21 | 0.40 | 0.70 |
| Lipid | 1-(1-enyl-stearoyl)-2-arachidonoyl-GPE (P-18:0/20:4)*  | -0.08 | -0.27 | 0.11 | 0.40 | 0.71 |
| Lipid | sphingomyelin (d18:2/21:0, d16:2/23:0)*                | -0.08 | -0.29 | 0.12 | 0.40 | 0.71 |
| Lipid | deoxycholic acid glucuronide                           | -0.04 | -0.13 | 0.05 | 0.41 | 0.71 |
| Lipid | 1-palmitoylglycerol (16:0)                             | 0.37  | -0.56 | 1.30 | 0.41 | 0.71 |
| Lipid | 1-stearoyl-2-docosahexaenoyl-GPE (18:0/22:6)*          | 0.13  | -0.20 | 0.46 | 0.41 | 0.71 |

|       |                                                         |       |       |      |      |      |
|-------|---------------------------------------------------------|-------|-------|------|------|------|
| Lipid | sphinganine-1-phosphate                                 | 0.19  | -0.29 | 0.67 | 0.42 | 0.71 |
| Lipid | 1-oleoylglycerol (18:1)                                 | 0.30  | -0.47 | 1.08 | 0.42 | 0.71 |
| Lipid | 1-stearoyl-2-oleoyl-GPC (18:0/18:1)                     | -0.10 | -0.38 | 0.17 | 0.42 | 0.72 |
| Lipid | glycocholate sulfate*                                   | -0.05 | -0.17 | 0.07 | 0.42 | 0.72 |
| Lipid | sphingomyelin (d18:1/21:0, d17:1/22:0, d16:1/23:0)*     | -0.08 | -0.28 | 0.12 | 0.43 | 0.73 |
| Lipid | 1-oleoyl-2-arachidonoyl-GPE (18:1/20:4)*                | -0.08 | -0.29 | 0.13 | 0.43 | 0.73 |
| Lipid | oleoyl-arachidonoyl-glycerol (18:1/20:4) [1]*           | 0.21  | -0.35 | 0.76 | 0.44 | 0.73 |
| Lipid | eicosanedioate (C20-DC)                                 | -0.08 | -0.29 | 0.13 | 0.44 | 0.73 |
| Lipid | linoleoylcholine*                                       | 0.24  | -0.40 | 0.87 | 0.44 | 0.73 |
| Lipid | heptenedioate (C7:1-DC)*                                | -0.08 | -0.28 | 0.13 | 0.44 | 0.73 |
| Lipid | sphingomyelin (d18:0/18:0, d19:0/17:0)*                 | -0.06 | -0.22 | 0.10 | 0.44 | 0.73 |
| Lipid | glycerol 3-phosphate                                    | -0.15 | -0.57 | 0.26 | 0.45 | 0.73 |
| Lipid | 1-stearoyl-2-linoleoyl-GPI (18:0/18:2)                  | -0.11 | -0.41 | 0.19 | 0.45 | 0.73 |
| Lipid | 1-palmitoleoyl-GPC (16:1)*                              | 0.07  | -0.13 | 0.27 | 0.45 | 0.73 |
| Lipid | 1-stearoyl-2-docosahexaenoyl-GPC (18:0/22:6)            | -0.08 | -0.30 | 0.14 | 0.45 | 0.73 |
| Lipid | mead acid (20:3n9)                                      | -0.12 | -0.46 | 0.22 | 0.45 | 0.73 |
| Lipid | 1-palmitoyl-2-dihomo-linolenoyl-GPC (16:0/20:3n3 or 6)* | -0.07 | -0.26 | 0.12 | 0.46 | 0.73 |
| Lipid | 1-(1-enyl-palmitoyl)-GPC (P-16:0)*                      | 0.10  | -0.17 | 0.36 | 0.46 | 0.74 |
| Lipid | sphingomyelin (d18:1/20:1, d18:2/20:0)*                 | -0.08 | -0.29 | 0.14 | 0.46 | 0.74 |
| Lipid | pimeloylcarnitine/3-methyladipoylcarnitine (C7-DC)      | -0.05 | -0.18 | 0.09 | 0.46 | 0.74 |
| Lipid | 1-arachidonoylglycerol (20:4)                           | 0.20  | -0.36 | 0.76 | 0.46 | 0.74 |
| Lipid | 1-dihomo-linoleoyl-GPC (20:2)*                          | 0.14  | -0.26 | 0.55 | 0.46 | 0.74 |
| Lipid | sphingosine                                             | -0.27 | -1.04 | 0.50 | 0.46 | 0.74 |
| Lipid | 1-stearoyl-2-arachidonoyl-GPE (18:0/20:4)               | -0.07 | -0.26 | 0.12 | 0.47 | 0.74 |
| Lipid | androstenediol (3beta,17beta) disulfate (1)             | -0.02 | -0.07 | 0.03 | 0.47 | 0.74 |
| Lipid | stearoylcarnitine (C18)                                 | -0.11 | -0.43 | 0.21 | 0.47 | 0.74 |
| Lipid | androsterone glucuronide                                | -0.06 | -0.22 | 0.10 | 0.47 | 0.74 |
| Lipid | lactosyl-N-nervonoyl-sphingosine (d18:1/24:1)*          | -0.18 | -0.70 | 0.34 | 0.48 | 0.75 |
| Lipid | palmitoyl-linoleoyl-glycerol (16:0/18:2) [2]*           | 0.08  | -0.16 | 0.33 | 0.48 | 0.75 |
| Lipid | 1-palmitoyl-2-stearoyl-GPC (O-16:0/18:0)*               | -0.15 | -0.60 | 0.30 | 0.48 | 0.75 |

|       |                                                        |       |       |      |      |      |
|-------|--------------------------------------------------------|-------|-------|------|------|------|
| Lipid | 3,4-dihydroxybutyrate                                  | -0.16 | -0.62 | 0.31 | 0.49 | 0.75 |
| Lipid | 1-stearoyl-2-dihomo-linolenoyl-GPI (18:0/20:3n3 or 6)* | -0.09 | -0.38 | 0.19 | 0.49 | 0.75 |
| Lipid | 1-palmitoyl-GPG (16:0)*                                | -0.15 | -0.62 | 0.31 | 0.49 | 0.75 |
| Lipid | 2-hydroxybehenate                                      | 0.19  | -0.39 | 0.77 | 0.50 | 0.76 |
| Lipid | 1-arachidonoyl-GPE (20:4n6)*                           | -0.06 | -0.25 | 0.13 | 0.50 | 0.76 |
| Lipid | dehydroepiandrosterone sulfate (DHEA-S)                | -0.01 | -0.04 | 0.02 | 0.50 | 0.76 |
| Lipid | 1-pentadecanoyl-GPC (15:0)*                            | 0.10  | -0.21 | 0.42 | 0.50 | 0.76 |
| Lipid | 1-nonadecanoyl-GPC (19:0)                              | 0.07  | -0.15 | 0.28 | 0.50 | 0.76 |
| Lipid | sphingosine 1-phosphate                                | 0.11  | -0.22 | 0.43 | 0.50 | 0.76 |
| Lipid | 17alpha-hydroxypregnanolone glucuronide                | -0.05 | -0.20 | 0.10 | 0.51 | 0.77 |
| Lipid | 1-(1-enyl-palmitoyl)-2-oleoyl-GPE (P-16:0/18:1)*       | -0.08 | -0.32 | 0.17 | 0.51 | 0.77 |
| Lipid | sphingomyelin (d18:2/24:1, d18:1/24:2)*                | -0.09 | -0.36 | 0.19 | 0.51 | 0.77 |
| Lipid | 1-arachidonoyl-GPI (20:4)*                             | -0.26 | -1.11 | 0.58 | 0.52 | 0.77 |
| Lipid | cis-3,4-methyleneheptanoate                            | -0.04 | -0.18 | 0.09 | 0.52 | 0.77 |
| Lipid | glycoursodeoxycholic acid sulfate (1)                  | -0.02 | -0.07 | 0.04 | 0.52 | 0.77 |
| Lipid | 2-arachidonoyl-GPI (20:4)*                             | 0.18  | -0.39 | 0.74 | 0.52 | 0.77 |
| Lipid | 1-(1-enyl-palmitoyl)-2-arachidonoyl-GPE (P-16:0/20:4)* | -0.06 | -0.25 | 0.13 | 0.52 | 0.77 |
| Lipid | 1-(1-enyl-palmitoyl)-GPE (P-16:0)*                     | 0.16  | -0.36 | 0.68 | 0.52 | 0.77 |
| Lipid | sphingomyelin (d18:1/14:0, d16:1/16:0)*                | -0.08 | -0.33 | 0.17 | 0.52 | 0.77 |
| Lipid | sphingomyelin (d18:1/19:0, d19:1/18:0)*                | -0.06 | -0.27 | 0.14 | 0.53 | 0.77 |
| Lipid | 2-aminoheptanoate                                      | -0.04 | -0.17 | 0.09 | 0.53 | 0.78 |
| Lipid | cholesterol sulfate                                    | -0.06 | -0.27 | 0.15 | 0.53 | 0.78 |
| Lipid | 3-hydroxy-3-methylglutarate                            | -0.18 | -0.79 | 0.43 | 0.54 | 0.78 |
| Lipid | suberate (C8-DC)                                       | 0.08  | -0.19 | 0.34 | 0.54 | 0.78 |
| Lipid | sphingomyelin (d18:2/23:1)*                            | -0.05 | -0.24 | 0.14 | 0.55 | 0.79 |
| Lipid | lignoceroylcarnitine (C24)*                            | -0.06 | -0.28 | 0.16 | 0.56 | 0.79 |
| Lipid | 1-stearoyl-2-oleoyl-GPS (18:0/18:1)                    | 0.25  | -0.64 | 1.13 | 0.56 | 0.79 |
| Lipid | 2-linoleoylglycerol (18:2)                             | 0.18  | -0.46 | 0.81 | 0.56 | 0.79 |
| Lipid | pregnenetriol disulfate*                               | -0.02 | -0.09 | 0.05 | 0.56 | 0.80 |
| Lipid | sphingomyelin (d18:1/20:2, d18:2/20:1, d16:1/22:2)*    | -0.07 | -0.32 | 0.18 | 0.56 | 0.80 |

|       |                                                          |       |       |      |      |      |
|-------|----------------------------------------------------------|-------|-------|------|------|------|
| Lipid | cholesterol                                              | -0.09 | -0.43 | 0.24 | 0.56 | 0.80 |
| Lipid | 1-stearoyl-2-arachidonoyl-GPI (18:0/20:4)                | -0.07 | -0.34 | 0.19 | 0.57 | 0.80 |
| Lipid | adipate (C6-DC)                                          | 0.07  | -0.18 | 0.31 | 0.57 | 0.80 |
| Lipid | 1-(1-enyl-stearoyl)-2-docosahexaenoyl-GPC (P-18:0/22:6)* | -0.03 | -0.15 | 0.09 | 0.57 | 0.80 |
| Lipid | deoxycarnitine                                           | -0.06 | -0.30 | 0.17 | 0.57 | 0.80 |
| Lipid | 1-palmitoyl-2-arachidonoyl-GPE (16:0/20:4)*              | -0.05 | -0.22 | 0.13 | 0.58 | 0.81 |
| Lipid | 1,2-dipalmitoyl-GPC (16:0/16:0)                          | -0.09 | -0.44 | 0.25 | 0.58 | 0.81 |
| Lipid | 3-hydroxyhexanoylcarnitine (1)                           | -0.03 | -0.17 | 0.10 | 0.58 | 0.81 |
| Lipid | octadecanedioylcarnitine (C18-DC)*                       | 0.05  | -0.14 | 0.24 | 0.58 | 0.81 |
| Lipid | tetrahydrocortisone glucuronide (5)                      | -0.05 | -0.22 | 0.13 | 0.58 | 0.81 |
| Lipid | etiocholanolone glucuronide                              | 0.04  | -0.10 | 0.18 | 0.58 | 0.81 |
| Lipid | 1-palmitoyl-2-oleoyl-GPC (16:0/18:1)                     | -0.07 | -0.33 | 0.19 | 0.59 | 0.81 |
| Lipid | hyocholate                                               | -0.06 | -0.30 | 0.18 | 0.59 | 0.81 |
| Lipid | choline                                                  | -0.05 | -0.26 | 0.15 | 0.59 | 0.81 |
| Lipid | cortisone                                                | 0.06  | -0.16 | 0.28 | 0.59 | 0.81 |
| Lipid | sphingomyelin (d17:2/16:0, d18:2/15:0)*                  | -0.06 | -0.27 | 0.16 | 0.59 | 0.81 |
| Lipid | 1-adrenoyl-GPC (22:4)*                                   | -0.10 | -0.50 | 0.30 | 0.59 | 0.81 |
| Lipid | sphingomyelin (d18:1/24:1, d18:2/24:0)*                  | -0.08 | -0.38 | 0.22 | 0.60 | 0.81 |
| Lipid | 2-butenoylglycine                                        | -0.10 | -0.51 | 0.31 | 0.60 | 0.81 |
| Lipid | 1-stearoyl-2-(hydroxylinoleoyl)-GPC (18:0/18:2(OH))*     | -0.17 | -0.86 | 0.52 | 0.60 | 0.81 |
| Lipid | 1-eicosenoyl-GPC (20:1)*                                 | 0.08  | -0.24 | 0.39 | 0.60 | 0.81 |
| Lipid | chenodeoxycholate                                        | 0.08  | -0.25 | 0.41 | 0.61 | 0.82 |
| Lipid | arachidonoylcholine                                      | 0.17  | -0.52 | 0.85 | 0.61 | 0.82 |
| Lipid | tetrahydrocortisol glucuronide                           | -0.05 | -0.26 | 0.16 | 0.62 | 0.82 |
| Lipid | 2R,3R-dihydroxybutyrate                                  | -0.08 | -0.41 | 0.25 | 0.62 | 0.82 |
| Lipid | 2-stearoyl-GPI (18:0)*                                   | 0.20  | -0.69 | 1.10 | 0.64 | 0.83 |
| Lipid | tricosanoyl sphingomyelin (d18:1/23:0)*                  | -0.05 | -0.28 | 0.18 | 0.64 | 0.83 |
| Lipid | ximenoylcarnitine (C26:1)*                               | -0.07 | -0.37 | 0.23 | 0.64 | 0.83 |
| Lipid | 11-ketoetiocholanolone glucuronide                       | 0.03  | -0.11 | 0.17 | 0.64 | 0.83 |
| Lipid | pregnanediol-3-glucuronide                               | -0.03 | -0.15 | 0.09 | 0.64 | 0.83 |

|       |                                                        |       |       |      |      |      |
|-------|--------------------------------------------------------|-------|-------|------|------|------|
| Lipid | 1-linoleoyl-GPE (18:2)*                                | -0.05 | -0.29 | 0.19 | 0.65 | 0.84 |
| Lipid | 3-hydroxystearate                                      | -0.07 | -0.39 | 0.25 | 0.65 | 0.84 |
| Lipid | palmitoyl-arachidonoyl-glycerol (16:0/20:4) [1]*       | 0.10  | -0.37 | 0.57 | 0.66 | 0.85 |
| Lipid | 5alpha-androstan-3alpha,17beta-diol monosulfate (2)    | -0.01 | -0.08 | 0.05 | 0.67 | 0.85 |
| Lipid | 1-stearoyl-GPC (18:0)                                  | 0.04  | -0.18 | 0.27 | 0.68 | 0.86 |
| Lipid | oleoyl-oleoyl-glycerol (18:1/18:1) [2]*                | 0.12  | -0.49 | 0.73 | 0.68 | 0.86 |
| Lipid | 1-linoleoyl-2-arachidonoyl-GPC (18:2/20:4n6)*          | 0.07  | -0.30 | 0.45 | 0.68 | 0.86 |
| Lipid | 1-(1-enyl-palmitoyl)-2-palmitoleoyl-GPC (P-16:0/16:1)* | -0.04 | -0.25 | 0.17 | 0.68 | 0.86 |
| Lipid | 1-stearyl-GPC (O-18:0)*                                | 0.06  | -0.26 | 0.39 | 0.69 | 0.87 |
| Lipid | 1-linoleoyl-GPI (18:2)*                                | -0.13 | -0.83 | 0.57 | 0.69 | 0.87 |
| Lipid | 12-HETE                                                | 0.21  | -0.93 | 1.36 | 0.70 | 0.87 |
| Lipid | 2-hydroxypalmitate                                     | -0.09 | -0.56 | 0.38 | 0.70 | 0.87 |
| Lipid | sphingomyelin (d18:2/18:1)*                            | -0.03 | -0.20 | 0.13 | 0.70 | 0.87 |
| Lipid | pregnenetriol sulfate*                                 | -0.02 | -0.11 | 0.08 | 0.70 | 0.87 |
| Lipid | octadecadienedioate (C18:2-DC)*                        | -0.03 | -0.21 | 0.14 | 0.70 | 0.87 |
| Lipid | behenoyl dihydrosphingomyelin (d18:0/22:0)*            | -0.04 | -0.23 | 0.16 | 0.70 | 0.87 |
| Lipid | 2-palmitoyl-GPC (16:0)*                                | -0.07 | -0.45 | 0.31 | 0.70 | 0.87 |
| Lipid | 1-oleoyl-GPC (18:1)                                    | 0.04  | -0.18 | 0.26 | 0.70 | 0.87 |
| Lipid | 1-myristoylglycerol (14:0)                             | 0.10  | -0.45 | 0.65 | 0.71 | 0.87 |
| Lipid | sphingomyelin (d18:0/20:0, d16:0/22:0)*                | -0.04 | -0.23 | 0.16 | 0.71 | 0.87 |
| Lipid | N-stearoyltaurine                                      | -0.07 | -0.44 | 0.30 | 0.71 | 0.87 |
| Lipid | 3-hydroxyhexanoate                                     | -0.04 | -0.25 | 0.18 | 0.72 | 0.88 |
| Lipid | 1-palmitoleoyl-GPE (16:1)*                             | 0.03  | -0.14 | 0.19 | 0.72 | 0.88 |
| Lipid | behenoyl sphingomyelin (d18:1/22:0)*                   | 0.04  | -0.17 | 0.24 | 0.72 | 0.88 |
| Lipid | oleoyl-oleoyl-glycerol (18:1/18:1) [1]*                | 0.06  | -0.31 | 0.43 | 0.72 | 0.88 |
| Lipid | 1-palmitoyl-2-stearoyl-GPC (16:0/18:0)                 | -0.08 | -0.52 | 0.36 | 0.72 | 0.88 |
| Lipid | glycerophosphoethanolamine                             | 0.08  | -0.38 | 0.53 | 0.72 | 0.88 |
| Lipid | N-oleoylserine                                         | -0.07 | -0.47 | 0.34 | 0.72 | 0.88 |
| Lipid | 1-linolenoyl-GPC (18:3)*                               | -0.05 | -0.33 | 0.23 | 0.72 | 0.88 |
| Lipid | adipoylcarnitine (C6-DC)                               | -0.03 | -0.18 | 0.13 | 0.72 | 0.88 |

|       |                                                      |       |       |      |      |      |
|-------|------------------------------------------------------|-------|-------|------|------|------|
| Lipid | 1-linolenoyl-GPE (18:3)*                             | 0.04  | -0.19 | 0.27 | 0.72 | 0.88 |
| Lipid | 1-linoleoylglycerol (18:2)                           | -0.17 | -1.15 | 0.82 | 0.73 | 0.88 |
| Lipid | acetoacetate                                         | -0.08 | -0.59 | 0.42 | 0.73 | 0.88 |
| Lipid | 2-aminooctanoate                                     | -0.06 | -0.40 | 0.29 | 0.73 | 0.88 |
| Lipid | N-palmitoylserine                                    | 0.06  | -0.28 | 0.39 | 0.73 | 0.88 |
| Lipid | 5alpha-androstan-3alpha,17beta-diol 17-glucuronide   | -0.05 | -0.37 | 0.27 | 0.74 | 0.88 |
| Lipid | androstenediol (3beta,17beta) monosulfate (2)        | -0.02 | -0.14 | 0.10 | 0.74 | 0.89 |
| Lipid | erucate (22:1n9)                                     | -0.06 | -0.44 | 0.32 | 0.75 | 0.89 |
| Lipid | lignoceroyl sphingomyelin (d18:1/24:0)               | -0.03 | -0.23 | 0.17 | 0.75 | 0.89 |
| Lipid | 5alpha-androstan-3beta,17alpha-diol disulfate        | -0.01 | -0.05 | 0.04 | 0.75 | 0.89 |
| Lipid | andro steroid monosulfate C19H28O6S (1)*             | -0.01 | -0.10 | 0.07 | 0.76 | 0.89 |
| Lipid | phosphatidylcholine (18:0/20:2, 20:0/18:2)*          | -0.05 | -0.36 | 0.27 | 0.76 | 0.90 |
| Lipid | 1-palmitoyl-GPC (16:0)                               | 0.04  | -0.26 | 0.35 | 0.77 | 0.90 |
| Lipid | sphingomyelin (d18:2/24:2)*                          | -0.04 | -0.32 | 0.24 | 0.77 | 0.90 |
| Lipid | 17alpha-hydroxypregnenolone 3-sulfate                | 0.05  | -0.29 | 0.39 | 0.77 | 0.90 |
| Lipid | diacylglycerol (16:1/18:2 [2], 16:0/18:3 [1])*       | 0.03  | -0.17 | 0.22 | 0.77 | 0.90 |
| Lipid | 1-palmitoyl-2-arachidonoyl-GPI (16:0/20:4)*          | -0.08 | -0.68 | 0.52 | 0.77 | 0.90 |
| Lipid | 1-margaroyl-2-oleoyl-GPC (17:0/18:1)*                | -0.03 | -0.29 | 0.22 | 0.78 | 0.91 |
| Lipid | 3-carboxy-4-methyl-5-propyl-2-furanpropanoate (CMPF) | -0.01 | -0.11 | 0.08 | 0.78 | 0.91 |
| Lipid | 1-dihomo-linolenylglycerol (20:3)                    | 0.16  | -1.11 | 1.44 | 0.79 | 0.92 |
| Lipid | pregnenediol disulfate (C21H34O8S2)*                 | -0.01 | -0.08 | 0.06 | 0.79 | 0.92 |
| Lipid | 1-stearoyl-2-adrenoyl-GPC (18:0/22:4)*               | -0.02 | -0.20 | 0.16 | 0.79 | 0.92 |
| Lipid | cortolone glucuronide (1)                            | -0.03 | -0.30 | 0.23 | 0.79 | 0.92 |
| Lipid | 1-stearoyl-2-meadoyl-GPC (18:0/20:3n9)*              | -0.02 | -0.14 | 0.11 | 0.80 | 0.92 |
| Lipid | 1-stearoyl-2-oleoyl-GPI (18:0/18:1)*                 | -0.05 | -0.51 | 0.41 | 0.80 | 0.92 |
| Lipid | valerate (5:0)                                       | -0.07 | -0.63 | 0.50 | 0.80 | 0.92 |
| Lipid | 5alpha-pregnan-3beta,20alpha-diol disulfate          | -0.01 | -0.11 | 0.08 | 0.81 | 0.92 |
| Lipid | 1-behenoyl-GPC (22:0)                                | -0.03 | -0.32 | 0.25 | 0.81 | 0.92 |
| Lipid | malonate                                             | -0.07 | -0.66 | 0.53 | 0.81 | 0.92 |
| Lipid | 1-palmitoleoyl-2-linolenoyl-GPC (16:1/18:3)*         | -0.04 | -0.42 | 0.33 | 0.82 | 0.92 |

|       |                                                   |       |       |      |      |      |
|-------|---------------------------------------------------|-------|-------|------|------|------|
| Lipid | 1-stearoyl-2-arachidonoyl-GPC (18:0/20:4)         | -0.02 | -0.20 | 0.16 | 0.82 | 0.92 |
| Lipid | oleoyl-arachidonoyl-glycerol (18:1/20:4) [2]*     | -0.04 | -0.45 | 0.36 | 0.82 | 0.92 |
| Lipid | 1-palmitoyl-GPE (16:0)                            | 0.03  | -0.22 | 0.27 | 0.82 | 0.92 |
| Lipid | 1-linoleoyl-GPC (18:2)                            | -0.05 | -0.50 | 0.40 | 0.82 | 0.93 |
| Lipid | 1-oleoyl-GPI (18:1)                               | -0.08 | -0.81 | 0.66 | 0.83 | 0.93 |
| Lipid | palmitoylcholine                                  | 0.06  | -0.57 | 0.70 | 0.83 | 0.93 |
| Lipid | pregnenolone sulfate                              | -0.02 | -0.25 | 0.20 | 0.83 | 0.93 |
| Lipid | 11beta-hydroxyandrosterone glucuronide            | 0.01  | -0.10 | 0.12 | 0.84 | 0.93 |
| Lipid | 1-nonadecenoyl-GPC (19:1)*                        | 0.03  | -0.31 | 0.38 | 0.84 | 0.93 |
| Lipid | margaroylcarnitine (C17)*                         | -0.03 | -0.40 | 0.33 | 0.84 | 0.93 |
| Lipid | linoleoyl-arachidonoyl-glycerol (18:2/20:4) [2]*  | -0.02 | -0.22 | 0.18 | 0.84 | 0.93 |
| Lipid | tetrahydrocortisol sulfate (1)                    | -0.01 | -0.13 | 0.11 | 0.85 | 0.94 |
| Lipid | N-stearoylserine*                                 | 0.07  | -0.69 | 0.83 | 0.85 | 0.94 |
| Lipid | glycochenodeoxycholate glucuronide (1)            | -0.01 | -0.13 | 0.11 | 0.85 | 0.94 |
| Lipid | 4-methylhexanoylglutamine                         | -0.01 | -0.18 | 0.15 | 0.85 | 0.94 |
| Lipid | 1-eicosapentaenoyl-GPC (20:5)*                    | 0.02  | -0.17 | 0.21 | 0.85 | 0.94 |
| Lipid | hexanoylglutamine                                 | -0.02 | -0.25 | 0.21 | 0.86 | 0.94 |
| Lipid | 1-stearyl-2-arachidonoyl-GPC (O-18:0/20:4)*       | 0.02  | -0.19 | 0.22 | 0.86 | 0.94 |
| Lipid | 5alpha-androstan-3alpha,17beta-diol disulfate     | -0.01 | -0.07 | 0.06 | 0.86 | 0.94 |
| Lipid | 1-palmitoyl-2-oleoyl-GPI (16:0/18:1)*             | 0.03  | -0.36 | 0.43 | 0.86 | 0.94 |
| Lipid | 1-oleoyl-GPG (18:1)*                              | 0.04  | -0.42 | 0.50 | 0.86 | 0.94 |
| Lipid | branched chain 14:0 dicarboxylic acid**           | 0.01  | -0.12 | 0.14 | 0.86 | 0.94 |
| Lipid | eicosenoylcarnitine (C20:1)*                      | -0.02 | -0.27 | 0.23 | 0.87 | 0.94 |
| Lipid | 16alpha-hydroxy DHEA 3-sulfate                    | 0.01  | -0.08 | 0.10 | 0.87 | 0.94 |
| Lipid | 2S,3R-dihydroxybutyrate                           | 0.02  | -0.18 | 0.21 | 0.87 | 0.94 |
| Lipid | 3-hydroxyoleoylcarnitine                          | -0.04 | -0.49 | 0.42 | 0.87 | 0.94 |
| Lipid | hydroxypalmitoyl sphingomyelin (d18:1/16:0(OH))** | 0.02  | -0.23 | 0.27 | 0.87 | 0.94 |
| Lipid | cis-3,4-methyleneheptanoylcarnitine               | 0.01  | -0.15 | 0.18 | 0.88 | 0.95 |
| Lipid | oleoyl-linoleoyl-glycerol (18:1/18:2) [2]         | -0.01 | -0.13 | 0.12 | 0.88 | 0.95 |
| Lipid | 1-palmitoyl-GPI (16:0)                            | 0.04  | -0.59 | 0.67 | 0.89 | 0.95 |

|       |                                                  |       |       |       |      |      |
|-------|--------------------------------------------------|-------|-------|-------|------|------|
| Lipid | nervonoylcarnitine (C24:1)*                      | -0.03 | -0.45 | 0.40  | 0.89 | 0.96 |
| Lipid | campesterol                                      | -0.01 | -0.24 | 0.21  | 0.90 | 0.96 |
| Lipid | 2-hydroxyglutarate                               | 0.01  | -0.22 | 0.25  | 0.90 | 0.96 |
| Lipid | decadienedioic acid (C10:2-DC)**                 | 0.01  | -0.09 | 0.11  | 0.91 | 0.97 |
| Lipid | N-stearoyl-sphingadienine (d18:2/18:0)*          | 0.01  | -0.18 | 0.20  | 0.92 | 0.97 |
| Lipid | beta-sitosterol                                  | -0.01 | -0.24 | 0.22  | 0.92 | 0.97 |
| Lipid | 1-docosahexaenoylglycerol (22:6)                 | -0.01 | -0.32 | 0.29  | 0.92 | 0.97 |
| Lipid | 1-myristoyl-GPC (14:0)                           | 0.01  | -0.23 | 0.25  | 0.92 | 0.97 |
| Lipid | 4-cholesten-3-one                                | 0.03  | -0.65 | 0.71  | 0.93 | 0.97 |
| Lipid | 1-stearoyl-2-docosahexaenoyl-GPI (18:0/22:6)*    | 0.02  | -0.46 | 0.50  | 0.93 | 0.97 |
| Lipid | 2-myristoyl-GPC (14:0)*                          | 0.01  | -0.25 | 0.27  | 0.93 | 0.97 |
| Lipid | 1-dihomo-linolenoyl-GPE (20:3n3 or 6)*           | -0.01 | -0.21 | 0.20  | 0.93 | 0.97 |
| Lipid | 5alpha-androstan-3beta,17beta-diol disulfate     | 0.00  | -0.06 | 0.07  | 0.94 | 0.98 |
| Lipid | 2-hydroxyarachidate*                             | -0.01 | -0.27 | 0.25  | 0.95 | 0.98 |
| Lipid | 1-docosahexaenoyl-GPC (22:6)*                    | 0.01  | -0.24 | 0.25  | 0.95 | 0.98 |
| Lipid | 2-hydroxysebacate                                | 0.00  | -0.20 | 0.19  | 0.96 | 0.99 |
| Lipid | androstenediol (3alpha, 17alpha) monosulfate (2) | 0.00  | -0.08 | 0.08  | 0.97 | 0.99 |
| Lipid | 2-hydroxynervonate*                              | 0.01  | -0.61 | 0.62  | 0.98 | 0.99 |
| Lipid | 11beta-hydroxyetiocholanolone glucuronide*       | 0.00  | -0.11 | 0.11  | 0.98 | 0.99 |
| Lipid | nisinate (24:6n3)                                | 0.01  | -0.50 | 0.51  | 0.98 | 0.99 |
| Lipid | 1-eicosapentaenoyl-GPE (20:5)*                   | 0.00  | -0.17 | 0.17  | 0.99 | 1.00 |
| Lipid | 2-hydroxystearate                                | 0.00  | -0.55 | 0.56  | 0.99 | 1.00 |
| NA    | X-21353                                          | -0.62 | -0.85 | -0.39 | 0.00 | 0.01 |
| NA    | X-23782                                          | -0.46 | -0.64 | -0.27 | 0.00 | 0.01 |
| NA    | X-26106                                          | -0.65 | -1.02 | -0.29 | 0.00 | 0.05 |
| NA    | X-12007                                          | -0.11 | -0.18 | -0.05 | 0.00 | 0.05 |
| NA    | X-17351                                          | -0.19 | -0.31 | -0.08 | 0.00 | 0.07 |
| NA    | X-12740                                          | -0.12 | -0.19 | -0.05 | 0.00 | 0.07 |
| NA    | X-17690                                          | -0.08 | -0.13 | -0.03 | 0.00 | 0.07 |
| NA    | X-16935                                          | -0.09 | -0.15 | -0.03 | 0.00 | 0.09 |

|    |         |       |       |       |      |      |
|----|---------|-------|-------|-------|------|------|
| NA | X-18913 | -0.26 | -0.43 | -0.09 | 0.01 | 0.10 |
| NA | X-11858 | -0.05 | -0.09 | -0.02 | 0.01 | 0.12 |
| NA | X-12283 | -0.24 | -0.42 | -0.07 | 0.01 | 0.14 |
| NA | X-21959 | 0.94  | 0.26  | 1.62  | 0.01 | 0.15 |
| NA | X-21815 | -0.07 | -0.12 | -0.02 | 0.01 | 0.15 |
| NA | X-18921 | -0.19 | -0.34 | -0.05 | 0.01 | 0.15 |
| NA | X-23644 | -0.09 | -0.16 | -0.02 | 0.01 | 0.16 |
| NA | X-25371 | -0.23 | -0.42 | -0.05 | 0.02 | 0.20 |
| NA | X-17146 | 1.14  | 0.21  | 2.07  | 0.02 | 0.21 |
| NA | X-11372 | -0.22 | -0.40 | -0.04 | 0.02 | 0.21 |
| NA | X-17438 | -0.17 | -0.32 | -0.03 | 0.02 | 0.22 |
| NA | X-24571 | -0.09 | -0.17 | -0.02 | 0.02 | 0.22 |
| NA | X-11850 | -0.05 | -0.09 | -0.01 | 0.02 | 0.24 |
| NA | X-12847 | -0.07 | -0.14 | -0.01 | 0.03 | 0.24 |
| NA | X-22834 | -0.21 | -0.38 | -0.03 | 0.03 | 0.25 |
| NA | X-13431 | -0.41 | -0.76 | -0.05 | 0.03 | 0.26 |
| NA | X-21821 | -0.12 | -0.22 | -0.01 | 0.03 | 0.26 |
| NA | X-12822 | -0.18 | -0.35 | -0.02 | 0.03 | 0.30 |
| NA | X-22143 | -0.18 | -0.36 | -0.01 | 0.04 | 0.32 |
| NA | X-26054 | -0.26 | -0.50 | -0.01 | 0.04 | 0.33 |
| NA | X-12013 | -0.07 | -0.14 | 0.00  | 0.04 | 0.33 |
| NA | X-12818 | -0.09 | -0.17 | 0.00  | 0.05 | 0.34 |
| NA | X-24337 | -0.16 | -0.33 | 0.00  | 0.05 | 0.35 |
| NA | X-18888 | -0.18 | -0.36 | 0.00  | 0.05 | 0.35 |
| NA | X-22509 | -0.09 | -0.18 | 0.00  | 0.05 | 0.35 |
| NA | X-12851 | -0.07 | -0.14 | 0.00  | 0.05 | 0.35 |
| NA | X-17354 | -0.11 | -0.21 | 0.00  | 0.05 | 0.35 |
| NA | X-23680 | -0.23 | -0.47 | 0.00  | 0.05 | 0.35 |
| NA | X-11861 | -0.27 | -0.55 | 0.01  | 0.05 | 0.36 |
| NA | X-24522 | -0.40 | -0.82 | 0.01  | 0.05 | 0.36 |

|    |         |       |       |      |      |      |
|----|---------|-------|-------|------|------|------|
| NA | X-12410 | -0.10 | -0.21 | 0.00 | 0.06 | 0.36 |
| NA | X-22776 | -0.66 | -1.35 | 0.03 | 0.06 | 0.37 |
| NA | X-25520 | -0.20 | -0.41 | 0.02 | 0.07 | 0.39 |
| NA | X-17365 | -0.09 | -0.20 | 0.01 | 0.07 | 0.39 |
| NA | X-24352 | -0.09 | -0.19 | 0.01 | 0.07 | 0.40 |
| NA | X-15728 | -0.04 | -0.08 | 0.00 | 0.07 | 0.40 |
| NA | X-12306 | -0.09 | -0.19 | 0.01 | 0.07 | 0.40 |
| NA | X-12411 | -0.28 | -0.59 | 0.03 | 0.08 | 0.40 |
| NA | X-25419 | -0.39 | -0.82 | 0.05 | 0.08 | 0.40 |
| NA | X-21285 | -0.12 | -0.24 | 0.01 | 0.08 | 0.40 |
| NA | X-12713 | -0.15 | -0.32 | 0.02 | 0.08 | 0.40 |
| NA | X-12462 | 0.62  | -0.10 | 1.33 | 0.09 | 0.43 |
| NA | X-23655 | -0.46 | -1.00 | 0.07 | 0.09 | 0.43 |
| NA | X-17010 | 0.32  | -0.05 | 0.69 | 0.09 | 0.43 |
| NA | X-14056 | -0.73 | -1.59 | 0.13 | 0.09 | 0.44 |
| NA | X-17325 | -0.10 | -0.23 | 0.02 | 0.10 | 0.46 |
| NA | X-26109 | -0.05 | -0.10 | 0.01 | 0.10 | 0.46 |
| NA | X-13553 | -0.10 | -0.22 | 0.02 | 0.10 | 0.47 |
| NA | X-11299 | -0.03 | -0.06 | 0.01 | 0.10 | 0.47 |
| NA | X-13728 | -0.06 | -0.14 | 0.02 | 0.11 | 0.48 |
| NA | X-21788 | -0.27 | -0.60 | 0.07 | 0.11 | 0.48 |
| NA | X-11787 | -0.21 | -0.47 | 0.05 | 0.11 | 0.49 |
| NA | X-16576 | 0.22  | -0.06 | 0.50 | 0.12 | 0.51 |
| NA | X-21310 | -0.24 | -0.55 | 0.07 | 0.12 | 0.51 |
| NA | X-21834 | -0.05 | -0.11 | 0.01 | 0.12 | 0.51 |
| NA | X-13695 | -0.19 | -0.43 | 0.06 | 0.12 | 0.51 |
| NA | X-21831 | -0.22 | -0.50 | 0.07 | 0.12 | 0.51 |
| NA | X-21471 | -0.14 | -0.31 | 0.04 | 0.12 | 0.51 |
| NA | X-24411 | 0.28  | -0.09 | 0.65 | 0.13 | 0.51 |
| NA | X-23157 | -0.94 | -2.19 | 0.31 | 0.13 | 0.51 |

|    |         |       |       |      |      |      |
|----|---------|-------|-------|------|------|------|
| NA | X-24306 | -0.72 | -1.70 | 0.26 | 0.14 | 0.52 |
| NA | X-12714 | -0.09 | -0.22 | 0.03 | 0.14 | 0.52 |
| NA | X-11378 | -0.22 | -0.52 | 0.08 | 0.14 | 0.53 |
| NA | X-13844 | -0.06 | -0.14 | 0.02 | 0.14 | 0.53 |
| NA | X-23665 | -0.48 | -1.15 | 0.19 | 0.15 | 0.54 |
| NA | X-12126 | -0.10 | -0.24 | 0.04 | 0.15 | 0.54 |
| NA | X-23276 | 0.33  | -0.14 | 0.81 | 0.16 | 0.54 |
| NA | X-17348 | -0.02 | -0.04 | 0.01 | 0.16 | 0.55 |
| NA | X-25519 | -0.45 | -1.11 | 0.21 | 0.17 | 0.55 |
| NA | X-17357 | 0.13  | -0.06 | 0.32 | 0.17 | 0.56 |
| NA | X-24418 | 0.09  | -0.05 | 0.22 | 0.18 | 0.56 |
| NA | X-26107 | -0.22 | -0.55 | 0.11 | 0.18 | 0.56 |
| NA | X-12812 | -0.08 | -0.20 | 0.04 | 0.18 | 0.56 |
| NA | X-11880 | -0.17 | -0.42 | 0.09 | 0.18 | 0.56 |
| NA | X-15503 | -0.13 | -0.32 | 0.07 | 0.19 | 0.56 |
| NA | X-12839 | -0.20 | -0.50 | 0.11 | 0.19 | 0.56 |
| NA | X-24970 | -0.22 | -0.57 | 0.12 | 0.19 | 0.56 |
| NA | X-21339 | -0.08 | -0.22 | 0.05 | 0.19 | 0.56 |
| NA | X-17335 | -0.22 | -0.57 | 0.13 | 0.20 | 0.57 |
| NA | X-13866 | -0.08 | -0.21 | 0.05 | 0.20 | 0.57 |
| NA | X-21816 | 0.18  | -0.11 | 0.46 | 0.20 | 0.57 |
| NA | X-21442 | 0.03  | -0.02 | 0.07 | 0.20 | 0.57 |
| NA | X-12111 | -0.13 | -0.34 | 0.08 | 0.21 | 0.58 |
| NA | X-25454 | -0.46 | -1.21 | 0.29 | 0.21 | 0.58 |
| NA | X-11483 | -0.03 | -0.08 | 0.02 | 0.22 | 0.59 |
| NA | X-24243 | -0.17 | -0.47 | 0.12 | 0.22 | 0.59 |
| NA | X-13658 | -0.03 | -0.09 | 0.02 | 0.23 | 0.60 |
| NA | X-21796 | 0.34  | -0.24 | 0.92 | 0.23 | 0.60 |
| NA | X-26111 | -0.02 | -0.06 | 0.02 | 0.23 | 0.60 |
| NA | X-25279 | -0.06 | -0.17 | 0.04 | 0.24 | 0.60 |

|    |         |       |       |      |      |      |
|----|---------|-------|-------|------|------|------|
| NA | X-21410 | -0.14 | -0.39 | 0.11 | 0.24 | 0.60 |
| NA | X-11849 | -0.01 | -0.04 | 0.01 | 0.24 | 0.61 |
| NA | X-23583 | -0.21 | -0.58 | 0.16 | 0.25 | 0.61 |
| NA | X-11478 | -0.08 | -0.21 | 0.06 | 0.25 | 0.61 |
| NA | X-12798 | -0.07 | -0.18 | 0.05 | 0.25 | 0.61 |
| NA | X-26062 | -0.16 | -0.44 | 0.12 | 0.25 | 0.61 |
| NA | X-23739 | -0.29 | -0.82 | 0.23 | 0.25 | 0.62 |
| NA | X-16938 | 0.22  | -0.18 | 0.62 | 0.26 | 0.62 |
| NA | X-12707 | -0.25 | -0.70 | 0.21 | 0.26 | 0.63 |
| NA | X-21319 | 0.18  | -0.15 | 0.51 | 0.26 | 0.63 |
| NA | X-11407 | 0.16  | -0.14 | 0.46 | 0.26 | 0.63 |
| NA | X-23587 | -0.16 | -0.45 | 0.13 | 0.27 | 0.63 |
| NA | X-12731 | -0.08 | -0.22 | 0.07 | 0.28 | 0.64 |
| NA | X-21258 | -0.03 | -0.10 | 0.03 | 0.28 | 0.64 |
| NA | X-23659 | 0.19  | -0.18 | 0.56 | 0.28 | 0.64 |
| NA | X-12104 | -0.18 | -0.54 | 0.17 | 0.29 | 0.64 |
| NA | X-12112 | 0.14  | -0.13 | 0.42 | 0.29 | 0.64 |
| NA | X-12830 | -0.05 | -0.14 | 0.05 | 0.29 | 0.64 |
| NA | X-25422 | -0.07 | -0.20 | 0.07 | 0.30 | 0.65 |
| NA | X-12816 | -0.01 | -0.03 | 0.01 | 0.30 | 0.65 |
| NA | X-23780 | -0.17 | -0.52 | 0.17 | 0.30 | 0.65 |
| NA | X-24953 | -0.14 | -0.44 | 0.15 | 0.31 | 0.66 |
| NA | X-17355 | -0.18 | -0.55 | 0.19 | 0.32 | 0.66 |
| NA | X-12729 | -0.05 | -0.15 | 0.05 | 0.32 | 0.67 |
| NA | X-21842 | -0.06 | -0.18 | 0.06 | 0.32 | 0.67 |
| NA | X-11308 | -0.07 | -0.20 | 0.07 | 0.33 | 0.67 |
| NA | X-21742 | -0.01 | -0.04 | 0.01 | 0.33 | 0.67 |
| NA | X-24295 | -0.33 | -1.02 | 0.37 | 0.33 | 0.67 |
| NA | X-26119 | -0.05 | -0.16 | 0.06 | 0.33 | 0.67 |
| NA | X-12726 | -0.17 | -0.56 | 0.21 | 0.35 | 0.69 |

|    |         |       |       |      |      |      |
|----|---------|-------|-------|------|------|------|
| NA | X-16397 | 0.16  | -0.19 | 0.50 | 0.35 | 0.69 |
| NA | X-11612 | -0.09 | -0.29 | 0.11 | 0.35 | 0.69 |
| NA | X-11843 | -0.03 | -0.10 | 0.04 | 0.36 | 0.69 |
| NA | X-24736 | 0.15  | -0.19 | 0.50 | 0.36 | 0.69 |
| NA | X-11315 | 0.06  | -0.08 | 0.20 | 0.37 | 0.70 |
| NA | X-24334 | -0.07 | -0.22 | 0.09 | 0.37 | 0.70 |
| NA | X-17367 | -0.13 | -0.43 | 0.17 | 0.38 | 0.70 |
| NA | X-18345 | -0.07 | -0.22 | 0.09 | 0.38 | 0.70 |
| NA | X-23593 | 0.13  | -0.18 | 0.44 | 0.38 | 0.70 |
| NA | X-24494 | 0.06  | -0.08 | 0.20 | 0.38 | 0.70 |
| NA | X-24328 | -0.05 | -0.18 | 0.07 | 0.38 | 0.70 |
| NA | X-17676 | -0.06 | -0.21 | 0.09 | 0.38 | 0.70 |
| NA | X-13726 | -0.02 | -0.08 | 0.03 | 0.38 | 0.70 |
| NA | X-17685 | -0.02 | -0.06 | 0.03 | 0.38 | 0.70 |
| NA | X-18901 | -0.03 | -0.12 | 0.05 | 0.38 | 0.70 |
| NA | X-16649 | 0.15  | -0.22 | 0.52 | 0.39 | 0.70 |
| NA | X-23974 | -0.17 | -0.57 | 0.24 | 0.39 | 0.70 |
| NA | X-21383 | 0.18  | -0.27 | 0.64 | 0.41 | 0.71 |
| NA | X-17328 | -0.08 | -0.30 | 0.13 | 0.41 | 0.71 |
| NA | X-21312 | 0.06  | -0.09 | 0.21 | 0.42 | 0.71 |
| NA | X-11847 | 0.03  | -0.04 | 0.09 | 0.43 | 0.73 |
| NA | X-25810 | -0.29 | -1.07 | 0.48 | 0.43 | 0.73 |
| NA | X-19183 | 0.14  | -0.23 | 0.50 | 0.44 | 0.73 |
| NA | X-23787 | -0.04 | -0.14 | 0.06 | 0.44 | 0.73 |
| NA | X-24951 | -0.16 | -0.61 | 0.29 | 0.45 | 0.73 |
| NA | X-21470 | -0.03 | -0.10 | 0.05 | 0.45 | 0.73 |
| NA | X-24757 | 0.09  | -0.16 | 0.33 | 0.45 | 0.73 |
| NA | X-25417 | -0.10 | -0.39 | 0.18 | 0.46 | 0.74 |
| NA | X-21840 | 0.02  | -0.03 | 0.06 | 0.46 | 0.74 |
| NA | X-24947 | -0.02 | -0.09 | 0.05 | 0.47 | 0.74 |

|    |         |       |       |      |      |      |
|----|---------|-------|-------|------|------|------|
| NA | X-23639 | 0.07  | -0.13 | 0.28 | 0.47 | 0.74 |
| NA | X-12906 | 0.11  | -0.20 | 0.42 | 0.47 | 0.74 |
| NA | X-24949 | -0.04 | -0.17 | 0.08 | 0.47 | 0.74 |
| NA | X-12844 | -0.06 | -0.22 | 0.11 | 0.48 | 0.74 |
| NA | X-18899 | 0.19  | -0.38 | 0.77 | 0.48 | 0.75 |
| NA | X-12101 | 0.04  | -0.07 | 0.15 | 0.49 | 0.75 |
| NA | X-18779 | -0.24 | -0.97 | 0.49 | 0.49 | 0.75 |
| NA | X-21607 | -0.08 | -0.34 | 0.17 | 0.49 | 0.76 |
| NA | X-24544 | -0.03 | -0.11 | 0.06 | 0.50 | 0.76 |
| NA | X-11632 | -0.10 | -0.41 | 0.21 | 0.50 | 0.76 |
| NA | X-24812 | -0.07 | -0.27 | 0.14 | 0.51 | 0.77 |
| NA | X-23666 | 0.17  | -0.38 | 0.72 | 0.51 | 0.77 |
| NA | X-25420 | -0.10 | -0.41 | 0.22 | 0.51 | 0.77 |
| NA | X-21441 | -0.03 | -0.12 | 0.06 | 0.53 | 0.77 |
| NA | X-21752 | -0.01 | -0.05 | 0.02 | 0.53 | 0.77 |
| NA | X-11795 | -0.07 | -0.30 | 0.16 | 0.53 | 0.77 |
| NA | X-21851 | -0.05 | -0.22 | 0.12 | 0.53 | 0.77 |
| NA | X-24972 | 0.09  | -0.21 | 0.39 | 0.54 | 0.78 |
| NA | X-12015 | 0.05  | -0.13 | 0.24 | 0.54 | 0.78 |
| NA | X-14082 | -0.09 | -0.40 | 0.22 | 0.54 | 0.78 |
| NA | X-15245 | 0.12  | -0.29 | 0.53 | 0.55 | 0.78 |
| NA | X-18886 | 0.04  | -0.10 | 0.18 | 0.55 | 0.79 |
| NA | X-21286 | -0.07 | -0.31 | 0.17 | 0.55 | 0.79 |
| NA | X-14904 | -0.15 | -0.69 | 0.38 | 0.55 | 0.79 |
| NA | X-24637 | -0.01 | -0.05 | 0.03 | 0.55 | 0.79 |
| NA | X-17612 | 0.18  | -0.46 | 0.82 | 0.55 | 0.79 |
| NA | X-24728 | 0.10  | -0.27 | 0.48 | 0.56 | 0.80 |
| NA | X-25343 | -0.15 | -0.67 | 0.38 | 0.57 | 0.80 |
| NA | X-15674 | 0.20  | -0.55 | 0.95 | 0.57 | 0.80 |
| NA | X-24556 | -0.09 | -0.44 | 0.25 | 0.58 | 0.81 |

|    |         |       |       |      |      |      |
|----|---------|-------|-------|------|------|------|
| NA | X-14939 | -0.04 | -0.18 | 0.10 | 0.59 | 0.81 |
| NA | X-15220 | -0.18 | -0.87 | 0.51 | 0.59 | 0.81 |
| NA | X-24475 | -0.08 | -0.40 | 0.24 | 0.60 | 0.81 |
| NA | X-17682 | 0.08  | -0.24 | 0.40 | 0.60 | 0.81 |
| NA | X-25937 | -0.03 | -0.13 | 0.08 | 0.60 | 0.81 |
| NA | X-11381 | -0.03 | -0.17 | 0.11 | 0.61 | 0.82 |
| NA | X-18922 | -0.03 | -0.15 | 0.09 | 0.62 | 0.82 |
| NA | X-17346 | -0.07 | -0.35 | 0.21 | 0.62 | 0.82 |
| NA | X-17654 | -0.03 | -0.18 | 0.11 | 0.62 | 0.82 |
| NA | X-26097 | -0.13 | -0.68 | 0.42 | 0.62 | 0.82 |
| NA | X-25957 | -0.21 | -1.10 | 0.68 | 0.62 | 0.82 |
| NA | X-13507 | -0.05 | -0.28 | 0.18 | 0.63 | 0.83 |
| NA | X-23654 | -0.07 | -0.39 | 0.25 | 0.63 | 0.83 |
| NA | X-12117 | 0.09  | -0.30 | 0.47 | 0.64 | 0.83 |
| NA | X-19141 | -0.03 | -0.14 | 0.09 | 0.64 | 0.83 |
| NA | X-16087 | 0.04  | -0.16 | 0.25 | 0.65 | 0.84 |
| NA | X-16580 | -0.05 | -0.30 | 0.19 | 0.66 | 0.85 |
| NA | X-21845 | -0.05 | -0.28 | 0.19 | 0.67 | 0.85 |
| NA | X-21364 | -0.02 | -0.11 | 0.07 | 0.68 | 0.86 |
| NA | X-12456 | -0.02 | -0.11 | 0.08 | 0.69 | 0.86 |
| NA | X-13007 | 0.08  | -0.33 | 0.48 | 0.69 | 0.87 |
| NA | X-07765 | -0.01 | -0.07 | 0.05 | 0.70 | 0.87 |
| NA | X-12100 | -0.06 | -0.39 | 0.27 | 0.70 | 0.87 |
| NA | X-19299 | 0.07  | -0.30 | 0.43 | 0.70 | 0.87 |
| NA | X-16964 | 0.13  | -0.57 | 0.82 | 0.71 | 0.87 |
| NA | X-11979 | 0.07  | -0.30 | 0.43 | 0.71 | 0.87 |
| NA | X-24588 | -0.04 | -0.28 | 0.20 | 0.72 | 0.88 |
| NA | X-21327 | 0.11  | -0.53 | 0.74 | 0.72 | 0.88 |
| NA | X-24422 | 0.06  | -0.30 | 0.43 | 0.72 | 0.88 |
| NA | X-23997 | -0.05 | -0.36 | 0.26 | 0.74 | 0.88 |

|    |         |       |       |      |      |      |
|----|---------|-------|-------|------|------|------|
| NA | X-13688 | -0.03 | -0.23 | 0.17 | 0.74 | 0.89 |
| NA | X-25267 | 0.08  | -0.44 | 0.61 | 0.75 | 0.89 |
| NA | X-11470 | -0.02 | -0.15 | 0.11 | 0.75 | 0.89 |
| NA | X-11444 | 0.02  | -0.09 | 0.12 | 0.75 | 0.89 |
| NA | X-12708 | -0.06 | -0.51 | 0.39 | 0.78 | 0.91 |
| NA | X-16124 | 0.01  | -0.05 | 0.06 | 0.79 | 0.92 |
| NA | X-24549 | -0.08 | -0.76 | 0.59 | 0.80 | 0.92 |
| NA | X-24462 | -0.06 | -0.53 | 0.42 | 0.80 | 0.92 |
| NA | X-25265 | 0.13  | -0.94 | 1.19 | 0.80 | 0.92 |
| NA | X-24307 | -0.05 | -0.52 | 0.41 | 0.80 | 0.92 |
| NA | X-25271 | -0.03 | -0.31 | 0.25 | 0.81 | 0.92 |
| NA | X-12544 | 0.01  | -0.07 | 0.09 | 0.82 | 0.92 |
| NA | X-12680 | -0.02 | -0.16 | 0.13 | 0.82 | 0.92 |
| NA | X-22508 | -0.05 | -0.50 | 0.41 | 0.83 | 0.93 |
| NA | X-25948 | -0.05 | -0.55 | 0.45 | 0.84 | 0.93 |
| NA | X-22520 | -0.02 | -0.20 | 0.16 | 0.84 | 0.93 |
| NA | X-12026 | -0.03 | -0.36 | 0.30 | 0.85 | 0.94 |
| NA | X-21467 | -0.01 | -0.14 | 0.12 | 0.85 | 0.94 |
| NA | X-15461 | -0.12 | -1.47 | 1.24 | 0.86 | 0.94 |
| NA | X-12718 | -0.03 | -0.42 | 0.35 | 0.86 | 0.94 |
| NA | X-23662 | 0.01  | -0.06 | 0.07 | 0.86 | 0.94 |
| NA | X-12216 | -0.01 | -0.14 | 0.12 | 0.88 | 0.95 |
| NA | X-19438 | -0.06 | -0.85 | 0.73 | 0.88 | 0.95 |
| NA | X-13729 | -0.01 | -0.13 | 0.11 | 0.88 | 0.95 |
| NA | X-12261 | 0.00  | -0.03 | 0.03 | 0.88 | 0.95 |
| NA | X-22162 | -0.02 | -0.42 | 0.37 | 0.89 | 0.96 |
| NA | X-24669 | 0.01  | -0.23 | 0.26 | 0.90 | 0.96 |
| NA | X-10458 | -0.02 | -0.35 | 0.32 | 0.91 | 0.97 |
| NA | X-15486 | 0.01  | -0.16 | 0.17 | 0.93 | 0.97 |
| NA | X-13684 | -0.01 | -0.25 | 0.23 | 0.93 | 0.97 |

|            |                                             |       |       |      |      |      |
|------------|---------------------------------------------|-------|-------|------|------|------|
| NA         | X-12221                                     | -0.01 | -0.26 | 0.24 | 0.93 | 0.97 |
| NA         | X-18887                                     | -0.01 | -0.19 | 0.18 | 0.94 | 0.98 |
| NA         | X-17653                                     | -0.01 | -0.20 | 0.18 | 0.94 | 0.98 |
| NA         | X-21733                                     | -0.01 | -0.19 | 0.18 | 0.95 | 0.98 |
| NA         | X-12193                                     | 0.00  | -0.18 | 0.19 | 0.96 | 0.99 |
| NA         | X-26108                                     | 0.02  | -0.70 | 0.74 | 0.96 | 0.99 |
| NA         | X-24546                                     | 0.00  | -0.10 | 0.09 | 0.96 | 0.99 |
| NA         | X-11852                                     | 0.00  | -0.06 | 0.06 | 0.97 | 0.99 |
| NA         | X-25433                                     | 0.00  | -0.16 | 0.17 | 0.97 | 0.99 |
| NA         | X-25790                                     | 0.00  | -0.29 | 0.30 | 0.98 | 0.99 |
| NA         | X-18935                                     | 0.00  | -0.07 | 0.08 | 0.98 | 0.99 |
| NA         | X-22771                                     | 0.00  | -0.33 | 0.33 | 0.98 | 0.99 |
| NA         | X-12407                                     | 0.00  | -0.30 | 0.30 | 0.99 | 0.99 |
| NA         | X-23636                                     | 0.00  | -0.54 | 0.54 | 0.99 | 1.00 |
| NA         | X-21736                                     | 0.00  | -0.15 | 0.15 | 1.00 | 1.00 |
| NA         | X-25457                                     | 0.00  | -0.11 | 0.11 | 1.00 | 1.00 |
| NA         | X-21661                                     | 0.00  | -0.04 | 0.04 | 1.00 | 1.00 |
| Nucleotide | 2'-O-methyluridine                          | -0.16 | -0.35 | 0.02 | 0.08 | 0.41 |
| Nucleotide | xanthosine                                  | -0.27 | -0.61 | 0.07 | 0.11 | 0.49 |
| Nucleotide | N6-carbamoylthreonyladenosine               | -0.15 | -0.35 | 0.05 | 0.12 | 0.51 |
| Nucleotide | 2'-deoxyuridine                             | 0.29  | -0.12 | 0.70 | 0.15 | 0.54 |
| Nucleotide | adenosine                                   | -0.40 | -0.96 | 0.17 | 0.15 | 0.54 |
| Nucleotide | pseudouridine                               | -0.26 | -0.62 | 0.11 | 0.16 | 0.54 |
| Nucleotide | guanosine                                   | -0.45 | -1.11 | 0.20 | 0.16 | 0.54 |
| Nucleotide | 5,6-dihydrouridine                          | -0.17 | -0.43 | 0.08 | 0.17 | 0.56 |
| Nucleotide | uridine                                     | -0.18 | -0.48 | 0.12 | 0.22 | 0.59 |
| Nucleotide | allantoin                                   | -0.30 | -0.80 | 0.20 | 0.22 | 0.59 |
| Nucleotide | N2,N2-dimethylguanosine                     | -0.33 | -0.95 | 0.29 | 0.28 | 0.64 |
| Nucleotide | adenosine 3',5'-cyclic monophosphate (cAMP) | 0.36  | -0.33 | 1.04 | 0.28 | 0.64 |
| Nucleotide | inosine                                     | -0.31 | -0.92 | 0.30 | 0.30 | 0.65 |

|                                   |                                                                     |       |       |       |      |      |
|-----------------------------------|---------------------------------------------------------------------|-------|-------|-------|------|------|
| Nucleotide                        | N6-methyladenosine                                                  | -0.18 | -0.56 | 0.20  | 0.32 | 0.67 |
| Nucleotide                        | N6-succinyladenosine                                                | 0.15  | -0.20 | 0.49  | 0.38 | 0.70 |
| Nucleotide                        | orotidine                                                           | -0.08 | -0.26 | 0.11  | 0.39 | 0.70 |
| Nucleotide                        | xanthine                                                            | -0.06 | -0.22 | 0.09  | 0.39 | 0.70 |
| Nucleotide                        | cytidine                                                            | -0.26 | -0.90 | 0.37  | 0.40 | 0.70 |
| Nucleotide                        | N-acetyl-beta-alanine                                               | 0.15  | -0.22 | 0.51  | 0.41 | 0.71 |
| Nucleotide                        | 5,6-dihydrouracil                                                   | 0.19  | -0.32 | 0.71  | 0.43 | 0.73 |
| Nucleotide                        | adenine                                                             | 0.18  | -0.32 | 0.67  | 0.45 | 0.73 |
| Nucleotide                        | adenosine 5'-monophosphate (AMP)                                    | 0.22  | -0.45 | 0.89  | 0.49 | 0.75 |
| Nucleotide                        | 3-ureidopropionate                                                  | 0.09  | -0.18 | 0.37  | 0.49 | 0.75 |
| Nucleotide                        | 3-methylcytidine                                                    | -0.12 | -0.52 | 0.28  | 0.53 | 0.78 |
| Nucleotide                        | thymidine                                                           | -0.09 | -0.39 | 0.21  | 0.54 | 0.78 |
| Nucleotide                        | N1-methylinosine                                                    | -0.10 | -0.43 | 0.23  | 0.54 | 0.78 |
| Nucleotide                        | N4-acetylcytidine                                                   | 0.12  | -0.41 | 0.65  | 0.64 | 0.83 |
| Nucleotide                        | 5,6-dihydrothymine                                                  | -0.17 | -0.95 | 0.60  | 0.64 | 0.83 |
| Nucleotide                        | orotate                                                             | -0.06 | -0.33 | 0.22  | 0.65 | 0.84 |
| Nucleotide                        | 7-methylguanine                                                     | -0.14 | -0.79 | 0.52  | 0.66 | 0.85 |
| Nucleotide                        | dihydroorotate                                                      | -0.05 | -0.36 | 0.26  | 0.73 | 0.88 |
| Nucleotide                        | 5-methyluridine (ribothymidine)                                     | -0.02 | -0.13 | 0.10  | 0.75 | 0.89 |
| Nucleotide                        | N1-methyladenosine                                                  | -0.06 | -0.44 | 0.33  | 0.76 | 0.90 |
| Nucleotide                        | uracil                                                              | 0.05  | -0.37 | 0.48  | 0.80 | 0.92 |
| Nucleotide                        | 3-aminoisobutyrate                                                  | 0.02  | -0.17 | 0.21  | 0.84 | 0.93 |
| Nucleotide                        | urate                                                               | -0.02 | -0.32 | 0.28  | 0.87 | 0.94 |
| Nucleotide                        | 2'-O-methylcytidine                                                 | -0.03 | -0.75 | 0.69  | 0.93 | 0.97 |
| Nucleotide                        | 3-(3-amino-3-carboxypropyl)uridine*                                 | -0.01 | -0.28 | 0.27  | 0.96 | 0.99 |
| Nucleotide                        | hypoxanthine                                                        | 0.00  | -0.84 | 0.85  | 0.99 | 1.00 |
| Partially Characterized Molecules | branched-chain, straight-chain, or cyclopropyl 10:1 fatty acid (1)* | -0.22 | -0.37 | -0.06 | 0.01 | 0.15 |

|                                   |                                                                 |       |       |      |      |      |
|-----------------------------------|-----------------------------------------------------------------|-------|-------|------|------|------|
| Partially Characterized Molecules | pentose acid*                                                   | -0.16 | -0.33 | 0.00 | 0.05 | 0.35 |
| Partially Characterized Molecules | glycine conjugate of C10H12O2*                                  | -0.24 | -0.56 | 0.08 | 0.13 | 0.51 |
| Partially Characterized Molecules | glycine conjugate of C10H14O2 (1)*                              | -0.11 | -0.25 | 0.04 | 0.13 | 0.52 |
| Partially Characterized Molecules | bilirubin degradation product, C16H18N2O5 (4)**                 | -0.26 | -0.65 | 0.14 | 0.19 | 0.56 |
| Partially Characterized Molecules | branched-chain, straight-chain, or cyclopropyl 12:1 fatty acid* | -0.45 | -1.15 | 0.26 | 0.19 | 0.56 |
| Partially Characterized Molecules | glutamine_degradant*                                            | -0.07 | -0.17 | 0.04 | 0.21 | 0.58 |
| Partially Characterized Molecules | bilirubin degradation product, C16H18N2O5 (2)**                 | -0.10 | -0.28 | 0.08 | 0.24 | 0.60 |
| Partially Characterized Molecules | glucuronide of C10H18O2 (1)*                                    | -0.08 | -0.27 | 0.11 | 0.38 | 0.70 |
| Partially Characterized Molecules | glucuronide of C10H18O2 (7)*                                    | 0.05  | -0.07 | 0.17 | 0.42 | 0.71 |
| Partially Characterized Molecules | bilirubin degradation product, C17H18N2O4 (3)**                 | -0.12 | -0.42 | 0.18 | 0.42 | 0.71 |
| Partially Characterized Molecules | bilirubin degradation product, C17H20N2O5 (1)**                 | -0.21 | -0.77 | 0.36 | 0.45 | 0.73 |
| Partially Characterized Molecules | metabolonic lactone sulfate                                     | -0.02 | -0.08 | 0.04 | 0.45 | 0.73 |
| Partially Characterized Molecules | glutamine conjugate of C6H10O2 (2)*                             | 0.05  | -0.09 | 0.18 | 0.45 | 0.73 |
| Partially Characterized Molecules | glutamine conjugate of C6H10O2 (1)*                             | 0.05  | -0.09 | 0.20 | 0.46 | 0.74 |

|                                   |                                                 |       |       |       |      |      |
|-----------------------------------|-------------------------------------------------|-------|-------|-------|------|------|
| Partially Characterized Molecules | bilirubin degradation product, C17H20N2O5 (2)** | -0.16 | -0.67 | 0.35  | 0.52 | 0.77 |
| Partially Characterized Molecules | bilirubin degradation product, C16H18N2O5 (1)** | 0.07  | -0.15 | 0.29  | 0.52 | 0.77 |
| Partially Characterized Molecules | GlcNAc sulfate conjugate of C21H34O2 steroid**  | -0.03 | -0.14 | 0.08  | 0.54 | 0.78 |
| Partially Characterized Molecules | bilirubin degradation product, C16H18N2O5 (3)** | -0.06 | -0.29 | 0.18  | 0.62 | 0.82 |
| Partially Characterized Molecules | glutamine conjugate of C7H12O2*                 | 0.03  | -0.12 | 0.19  | 0.67 | 0.85 |
| Partially Characterized Molecules | bilirubin degradation product, C17H18N2O4 (2)** | -0.06 | -0.36 | 0.24  | 0.68 | 0.86 |
| Partially Characterized Molecules | bilirubin degradation product, C17H18N2O4 (1)** | 0.02  | -0.30 | 0.34  | 0.89 | 0.96 |
| Peptide                           | gamma-glutamylmethionine                        | -0.48 | -0.94 | -0.02 | 0.04 | 0.32 |
| Peptide                           | 4-hydroxyphenylacetylglutamine                  | -0.11 | -0.22 | 0.00  | 0.04 | 0.33 |
| Peptide                           | isoleucylglycine                                | -0.39 | -0.80 | 0.01  | 0.06 | 0.36 |
| Peptide                           | gamma-glutamyl-alpha-lysine                     | -0.44 | -0.94 | 0.05  | 0.08 | 0.40 |
| Peptide                           | gamma-glutamyltryptophan                        | -0.29 | -0.66 | 0.09  | 0.12 | 0.51 |
| Peptide                           | phenylacetylglutamate                           | -0.12 | -0.28 | 0.04  | 0.14 | 0.52 |
| Peptide                           | 3-hydroxyphenylacetylglutamine                  | -0.07 | -0.17 | 0.03  | 0.15 | 0.53 |
| Peptide                           | gamma-glutamyltyrosine                          | -0.19 | -0.46 | 0.08  | 0.15 | 0.54 |
| Peptide                           | cyclo(leu-pro)                                  | -0.09 | -0.23 | 0.04  | 0.16 | 0.55 |
| Peptide                           | gamma-glutamylhistidine                         | -0.22 | -0.55 | 0.12  | 0.18 | 0.56 |
| Peptide                           | gamma-glutamylleucine                           | -0.11 | -0.31 | 0.08  | 0.23 | 0.60 |
| Peptide                           | gamma-glutamylisoleucine*                       | -0.13 | -0.36 | 0.09  | 0.23 | 0.60 |
| Peptide                           | gamma-glutamylthreonine                         | -0.14 | -0.39 | 0.10  | 0.23 | 0.60 |
| Peptide                           | fibrinopeptide B (1-13)**                       | 1.03  | -0.74 | 2.80  | 0.23 | 0.60 |
| Peptide                           | fibrinopeptide A, des-ala(1)*                   | 0.52  | -0.41 | 1.45  | 0.25 | 0.61 |

|         |                             |       |       |      |      |      |
|---------|-----------------------------|-------|-------|------|------|------|
| Peptide | gamma-glutamylvaline        | -0.08 | -0.23 | 0.07 | 0.28 | 0.64 |
| Peptide | isoleucylhydroxyproline*    | -0.14 | -0.45 | 0.17 | 0.34 | 0.68 |
| Peptide | leucylglycine               | -0.28 | -0.93 | 0.37 | 0.38 | 0.70 |
| Peptide | leucylhydroxyproline*       | -0.08 | -0.30 | 0.15 | 0.47 | 0.74 |
| Peptide | gamma-glutamylglycine       | -0.06 | -0.26 | 0.15 | 0.57 | 0.80 |
| Peptide | pyroglutamylvaline          | 0.07  | -0.20 | 0.34 | 0.58 | 0.81 |
| Peptide | gamma-glutamylglutamate     | 0.06  | -0.16 | 0.27 | 0.58 | 0.81 |
| Peptide | gamma-glutamylglutamine     | -0.08 | -0.52 | 0.35 | 0.69 | 0.86 |
| Peptide | N,N-dimethyl-pro-pro        | 0.07  | -0.45 | 0.59 | 0.77 | 0.90 |
| Peptide | gamma-glutamylcitrulline*   | -0.07 | -0.81 | 0.66 | 0.83 | 0.93 |
| Peptide | cyclo(pro-val)              | 0.02  | -0.16 | 0.19 | 0.84 | 0.93 |
| Peptide | phenylacetylcarnitine       | 0.00  | -0.07 | 0.06 | 0.92 | 0.97 |
| Peptide | phenylacetylglutamine       | 0.01  | -0.16 | 0.17 | 0.94 | 0.98 |
| Peptide | gamma-glutamylphenylalanine | -0.01 | -0.41 | 0.39 | 0.96 | 0.99 |
| Peptide | bradykinin, des-arg(9)      | 0.02  | -0.76 | 0.79 | 0.97 | 0.99 |

Table S4

Mean change in metabolite level in all patients following exenatide infusion (PAH and CTEPH)
